# Supplementary material for: Modulating radiative efficiency in ortho-carboranyl luminophores through electron-donating substituents: insights from intramolecular-charge-transfer-based emissions
Source: Royal Society of Chemistry journal article supplement (doi:10.1039/d4dt02897j), 2024-11-26
Supplement: d4dt02897j1.pdf [file d4dt02897j1.pdf]

Electronic supplementary information

**Modulating Radiative Efficiency in *ortho*-Carboranyl Luminophores through  
Electron-Donating Substituents  
: Insights from Intramolecular-Charge-Transfer-Based Emissions**

Soyeon Kim,<sup>a‡</sup> Dong Kyun You,<sup>a‡</sup> Namkyun Kim,<sup>a</sup> Ilsup Shin,<sup>a</sup> Dongwook Kim,<sup>b</sup>  
and Kang Mun Lee<sup>\*a</sup>

<sup>a</sup> Department of Chemistry, Institute for Molecular Science and Fusion Technology,  
Kangwon National University, Chuncheon 24341, Republic of Korea.

<sup>b</sup> Department of Chemistry, Korea Advanced Institute of Science and Technology, (KAIST),  
Daejeon 34141, Republic of Korea

<sup>‡</sup> The first and second authors contributed equally to this work.

**Contents**

|                                                                          |         |
|--------------------------------------------------------------------------|---------|
| NMR spectra for the precursor <b>FA</b> and <b>1CH-6CP</b> .....         | S2–S14  |
| Crystallographic data and parameters for <b>1CH-6CP</b> .....            | S15     |
| Selected bond lengths (Å) and angles (°) for <b>1CH-6CP</b> .....        | S16     |
| Theoretical calculation details for <b>1CH-6CP</b> .....                 | S17–S34 |
| PL spectra of <b>2CM-6CP</b> in THF/distilled water mixtures .....       | S35     |
| Emission decay curves for <b>1CH-6CP</b> in crystalline states .....     | S36     |
| Cartesian coordinates of <b>1CH-6CP</b> in each optimized geometry ..... | S37–S48 |

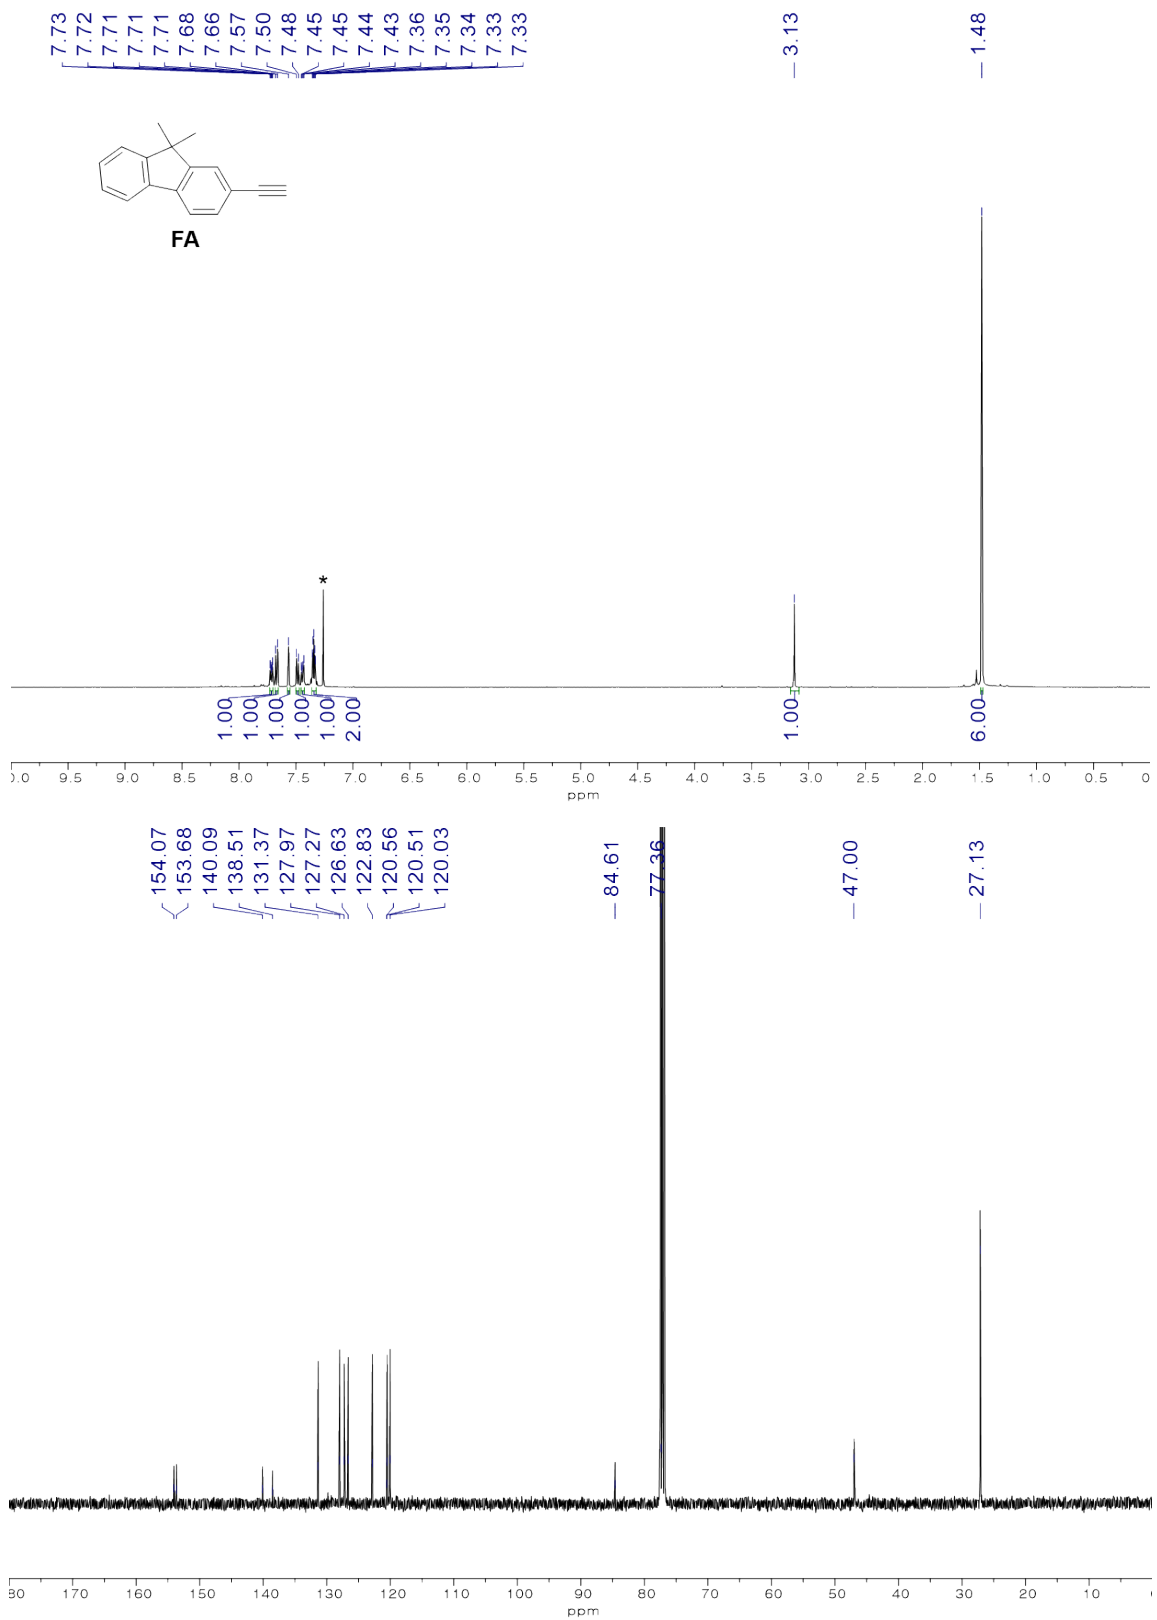

**Fig. S1** <sup>1</sup>H (top) and <sup>13</sup>C (bottom) nuclear magnetic resonance (NMR) spectra of **FA** in CDCl<sub>3</sub> (\*from residual CHCl<sub>3</sub> in CDCl<sub>3</sub>).

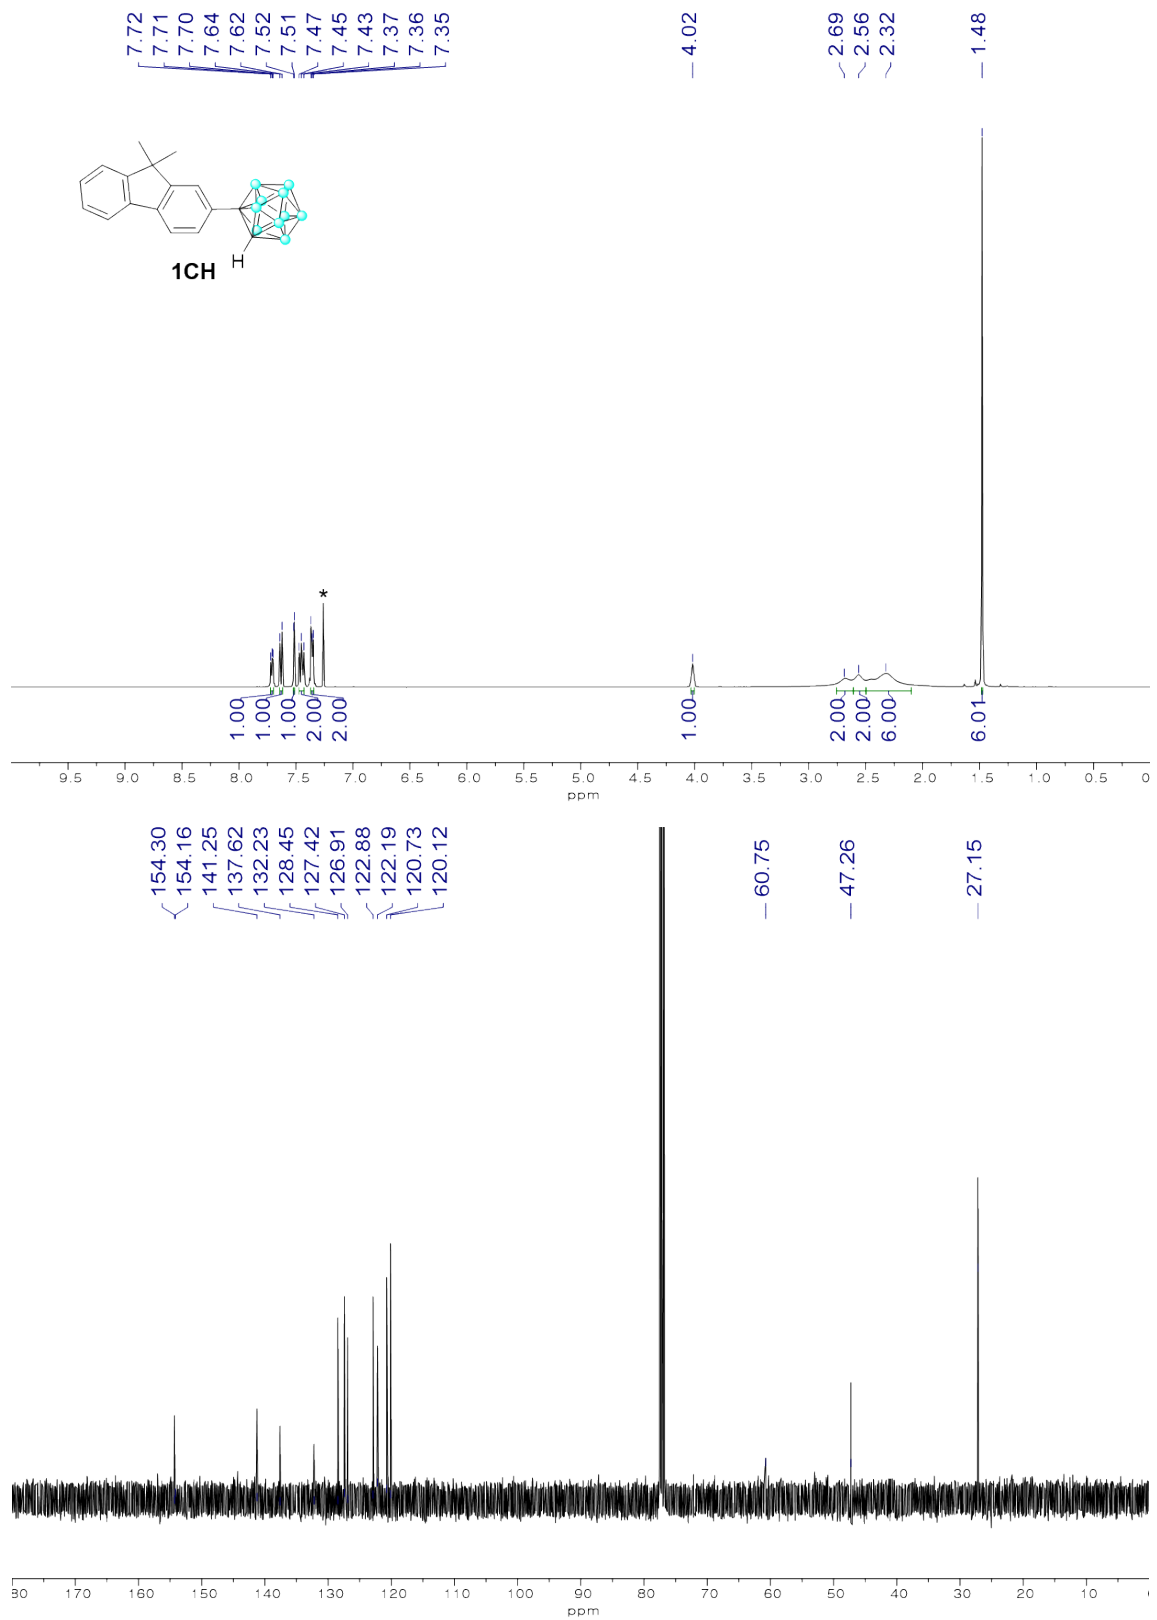

**Fig. S2**  $^1\text{H}\{^{11}\text{B}\}$  (top) and  $^{13}\text{C}$  (bottom) nuclear magnetic resonance (NMR) spectra of **1CH** in  $\text{CDCl}_3$  (\*from residual  $\text{CHCl}_3$  in  $\text{CDCl}_3$ ).

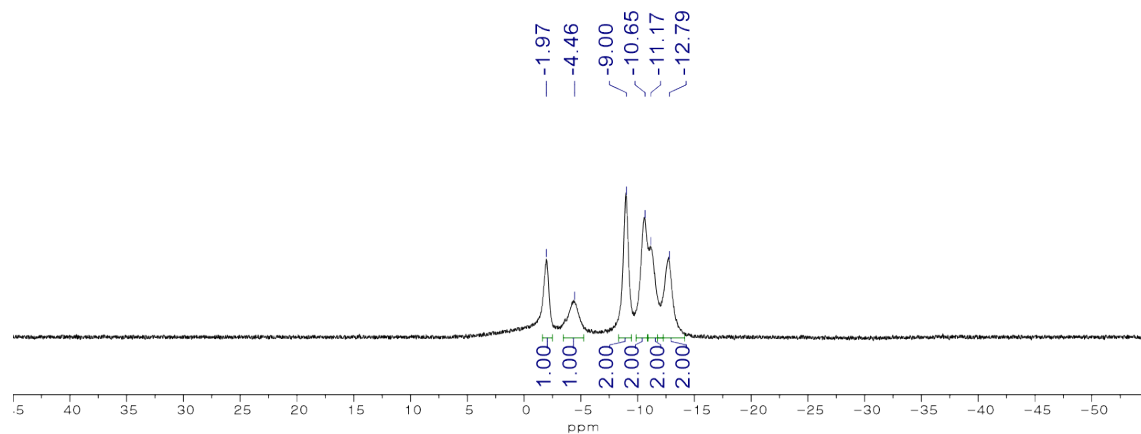

**Fig. S3**  $^{11}\text{B}\{^1\text{H}\}$  NMR spectra of **1CH** in  $\text{CDCl}_3$ .

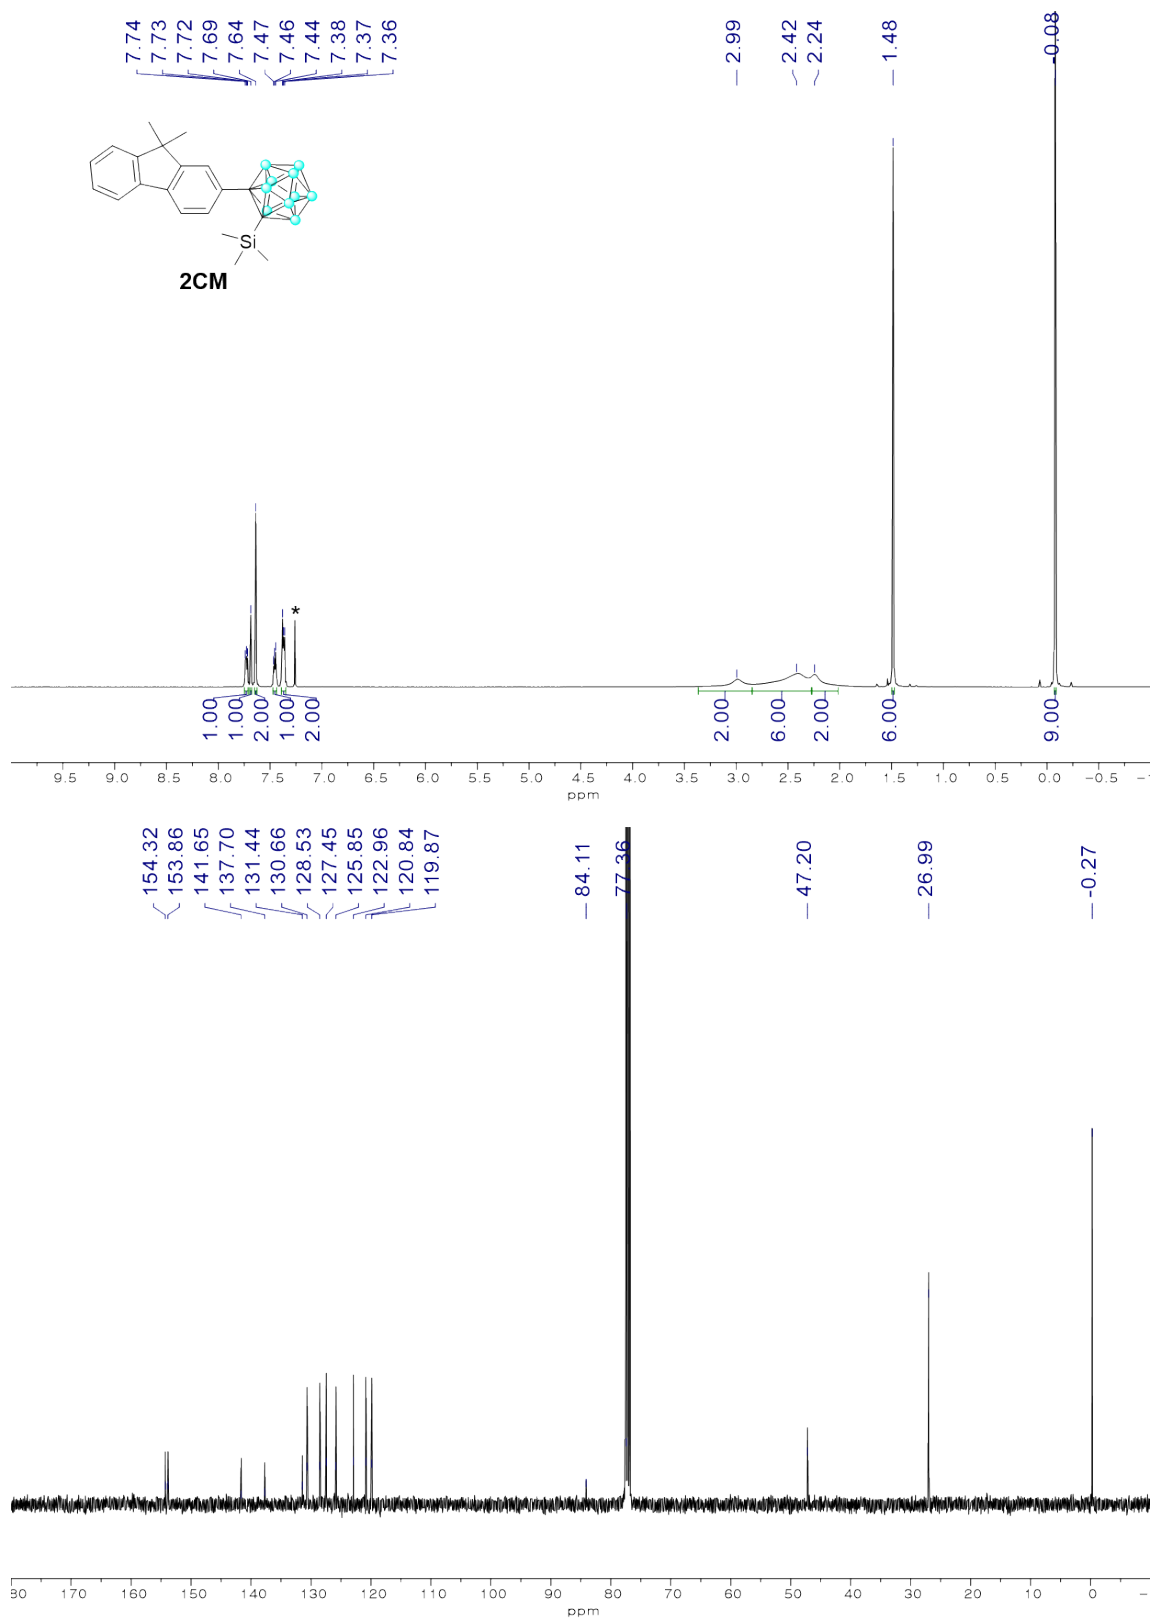

**Fig. S4**  $^1\text{H}\{^{11}\text{B}\}$  (top) and  $^{13}\text{C}$  (bottom) nuclear magnetic resonance (NMR) spectra of **2CM** in  $\text{CDCl}_3$  (\*from residual  $\text{CHCl}_3$  in  $\text{CDCl}_3$ ).

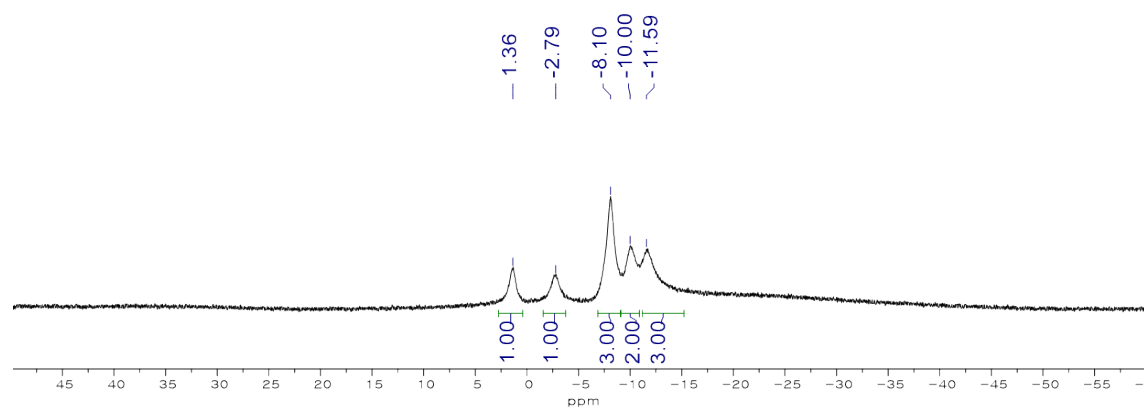

**Fig. S5**  $^{11}\text{B}\{^1\text{H}\}$  NMR spectra of **2CM** in  $\text{CDCl}_3$ .

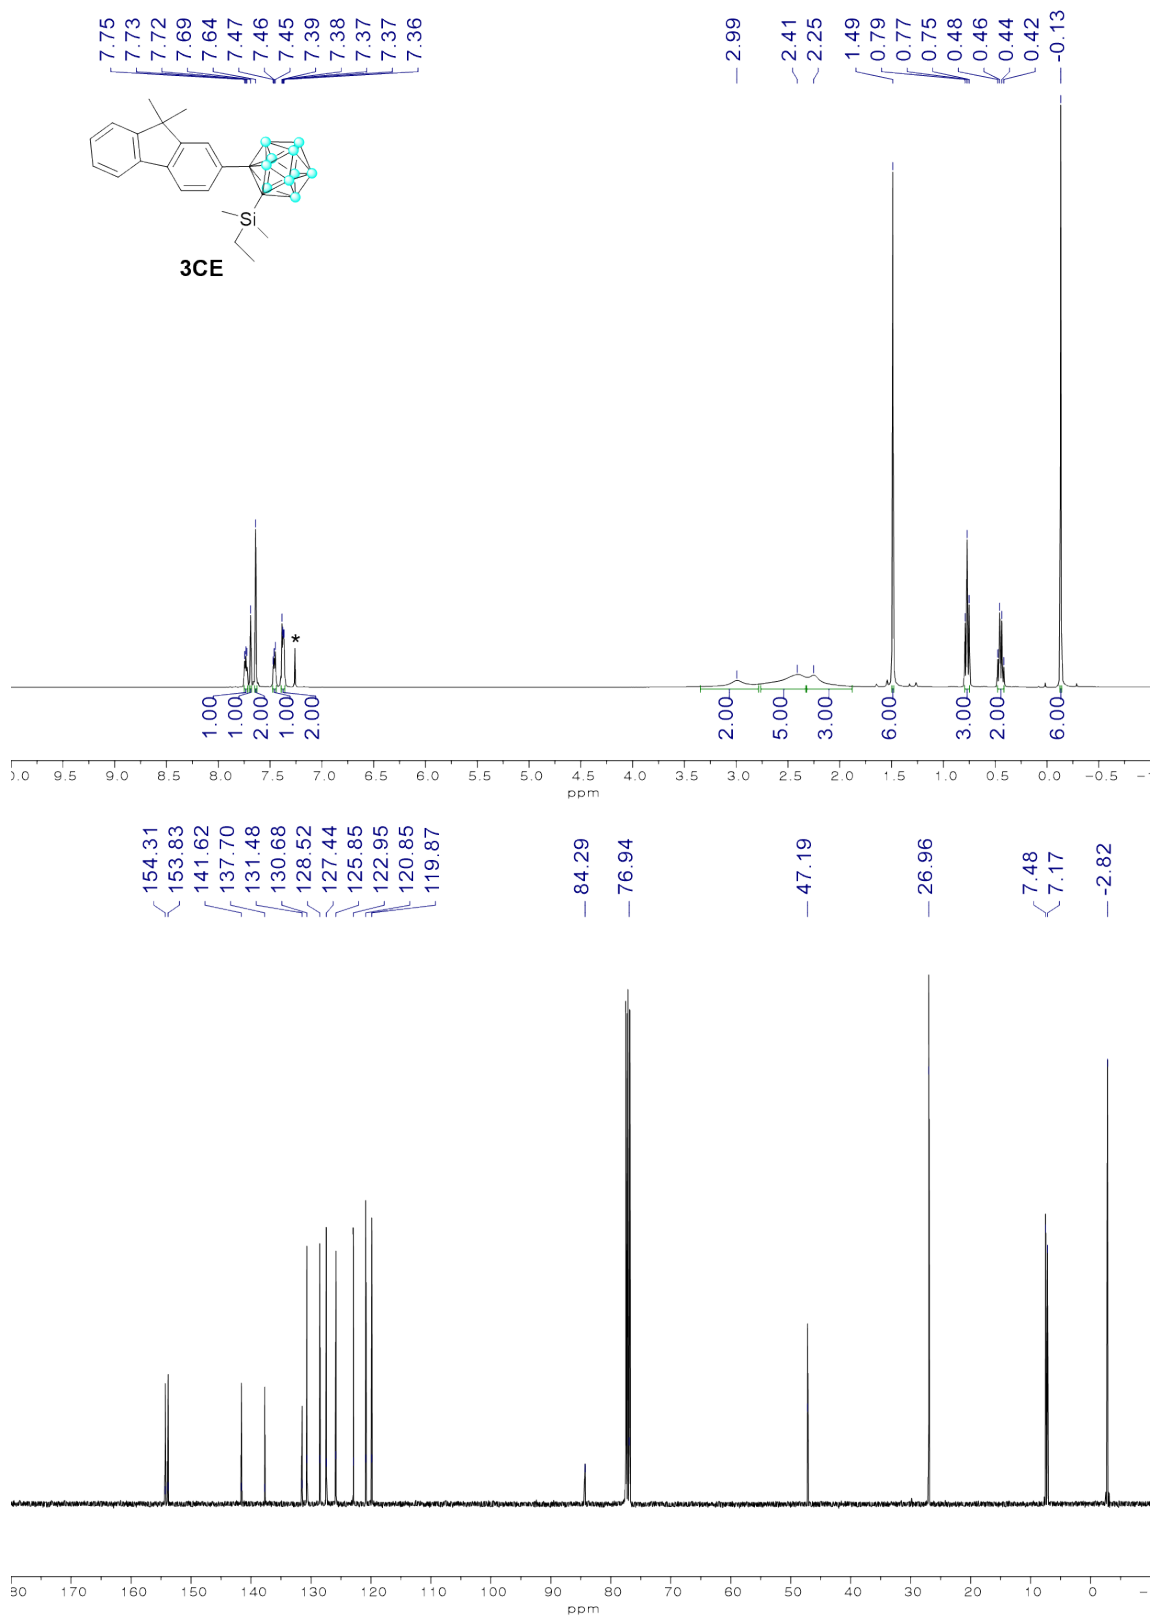

**Fig. S6**  $^1\text{H}\{^{11}\text{B}\}$  (top) and  $^{13}\text{C}$  (bottom) nuclear magnetic resonance (NMR) spectra of **3CE** in  $\text{CDCl}_3$  (\*from residual  $\text{CHCl}_3$  in  $\text{CDCl}_3$ ).

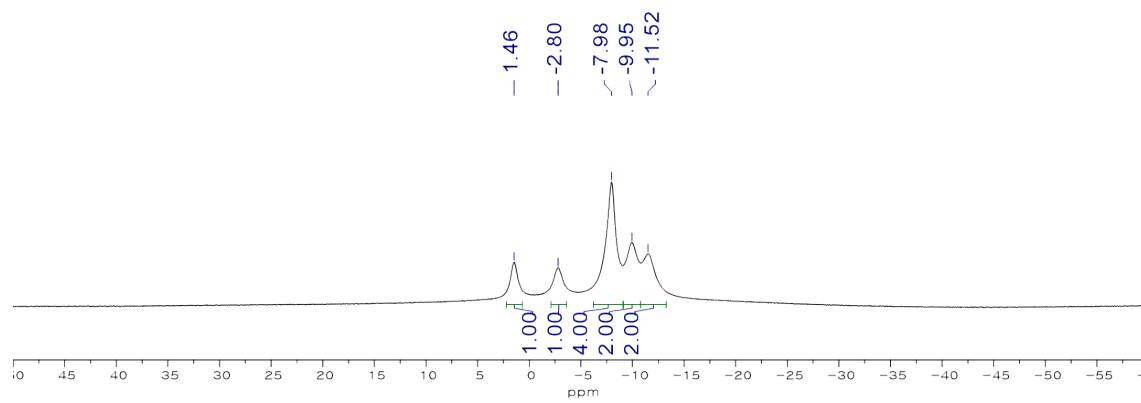

**Fig. S7**  $^{11}\text{B}\{^1\text{H}\}$  NMR spectra of **3CE** in  $\text{CDCl}_3$ .



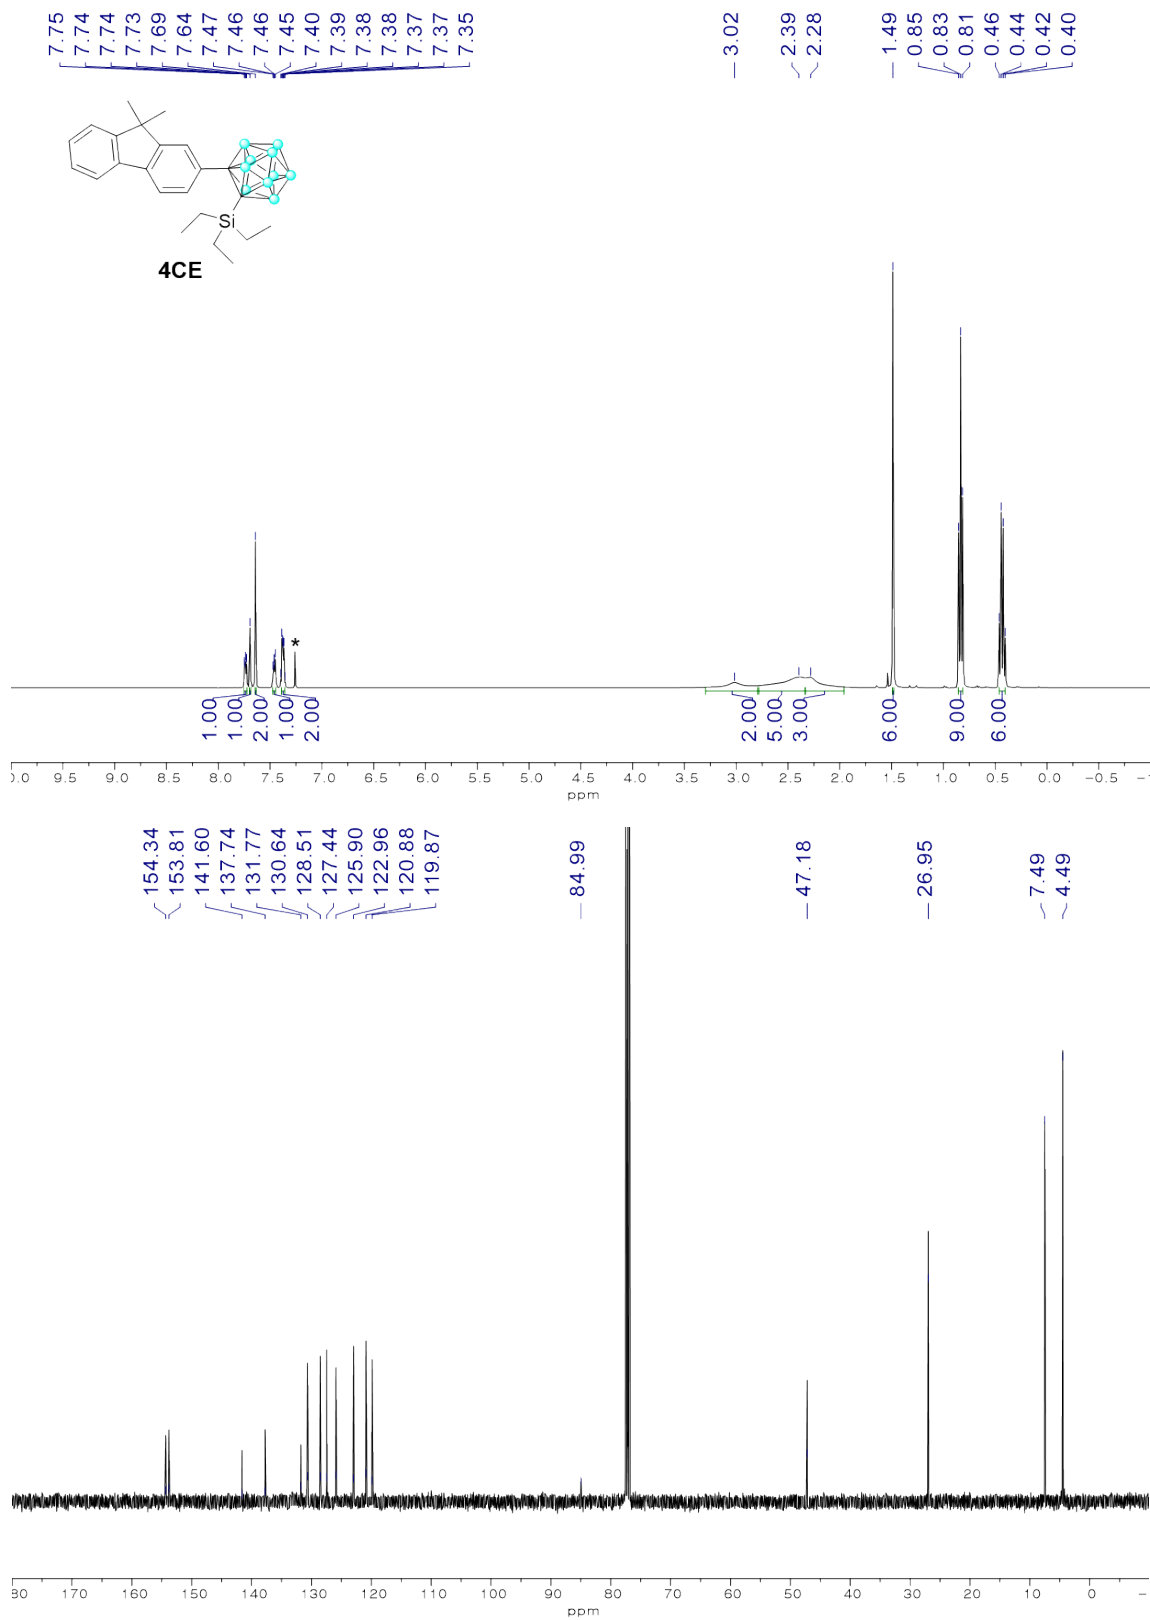

**Fig. S8**  $^1\text{H}\{^{11}\text{B}\}$  (top) and  $^{13}\text{C}$  (bottom) nuclear magnetic resonance (NMR) spectra of **4CE** in  $\text{CDCl}_3$  (\*from residual  $\text{CHCl}_3$  in  $\text{CDCl}_3$ ).

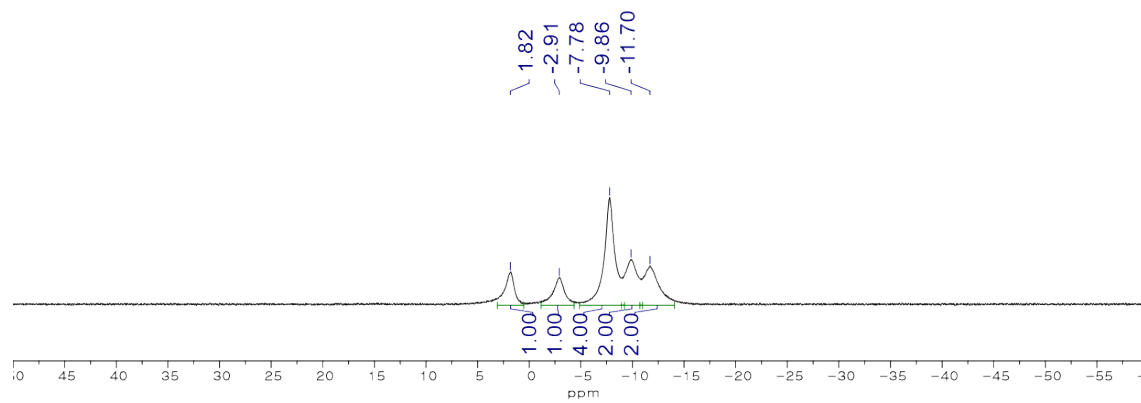

**Fig. S9**  $^{11}\text{B}\{^1\text{H}\}$  NMR spectra of **4CE** in  $\text{CDCl}_3$ .

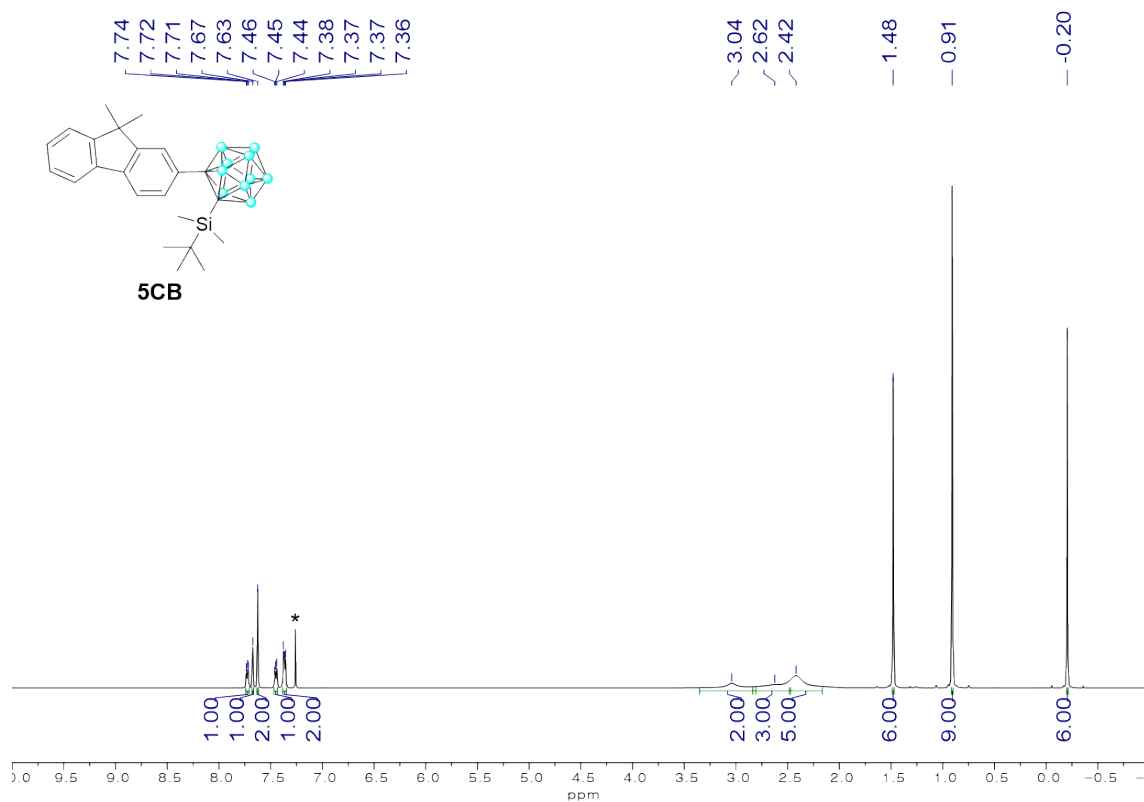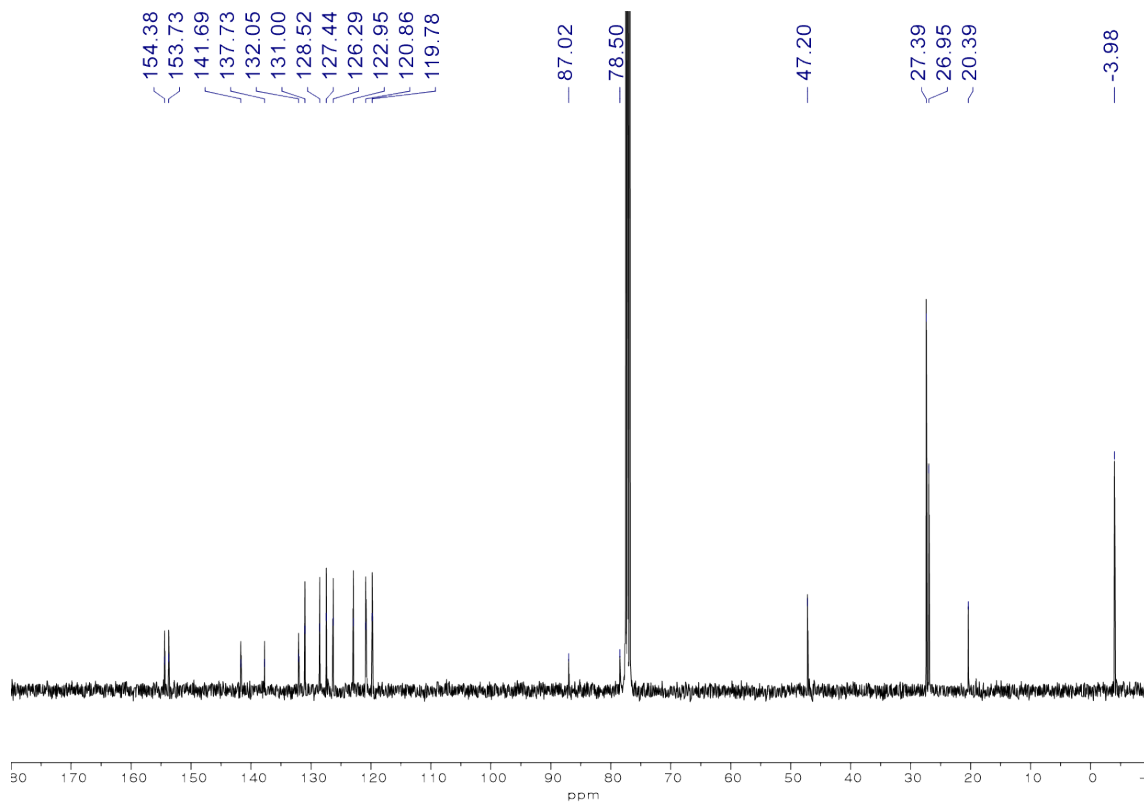

**Fig. S10**  $^1\text{H}\{^{11}\text{B}\}$  (top) and  $^{13}\text{C}$  (bottom) nuclear magnetic resonance (NMR) spectra of **5CB** in  $\text{CDCl}_3$  (\*from residual  $\text{CHCl}_3$  in  $\text{CDCl}_3$ ).

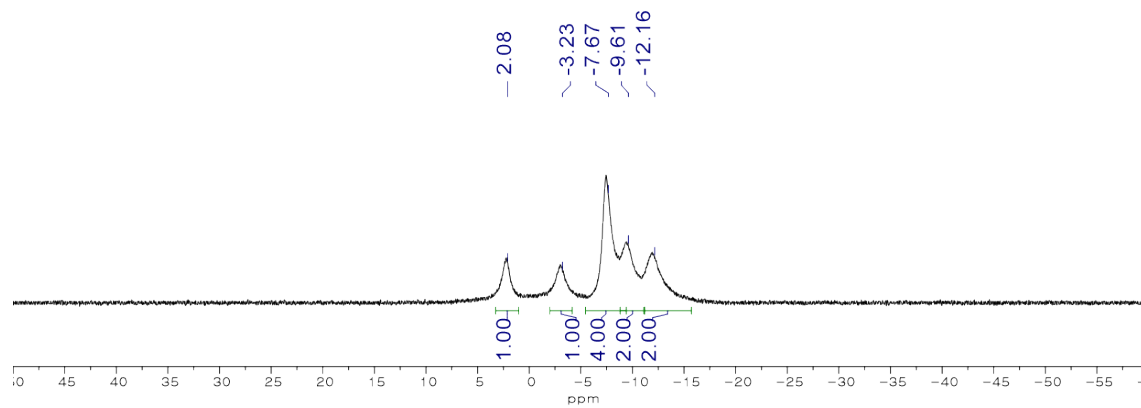

**Fig. S11**  $^{11}\text{B}\{^1\text{H}\}$  NMR spectra of **5CB** in  $\text{CDCl}_3$ .

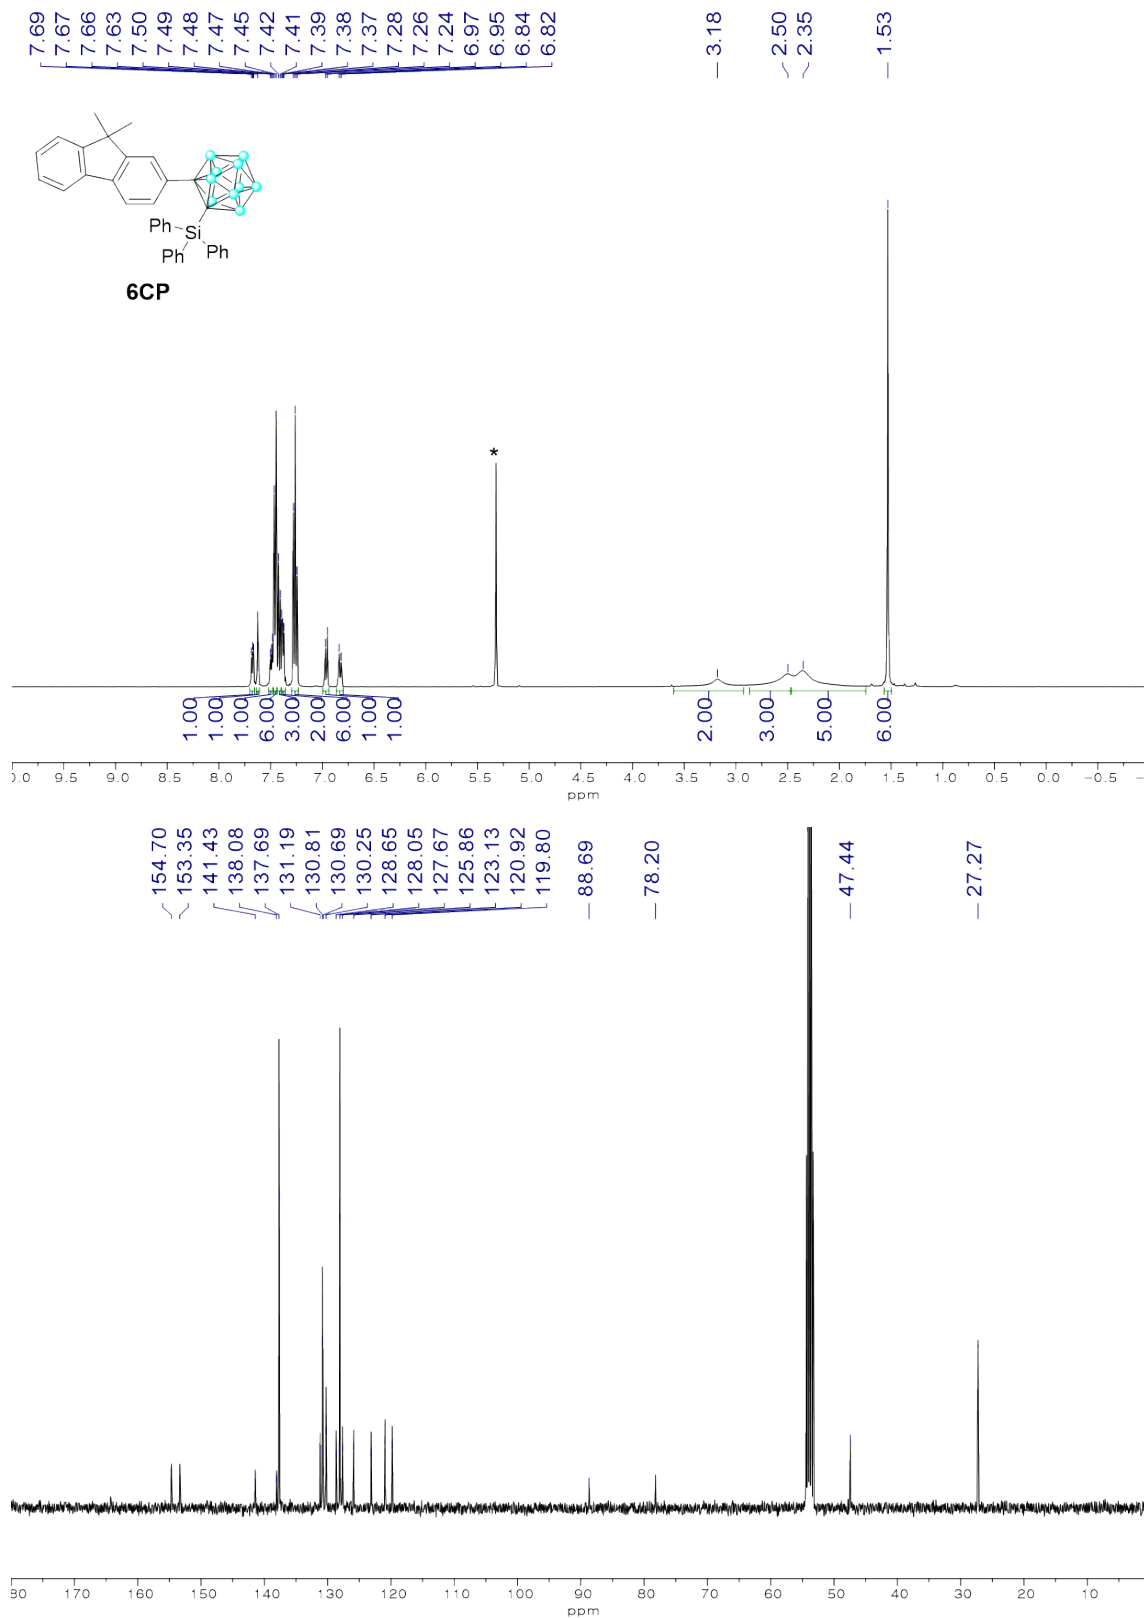

**Fig. S12**  $^1\text{H}\{^{11}\text{B}\}$  (top) and  $^{13}\text{C}$  (bottom) nuclear magnetic resonance (NMR) spectra of **6CP** in  $\text{CD}_2\text{Cl}_2$  (\*from residual  $\text{CH}_2\text{Cl}_2$  in  $\text{CD}_2\text{Cl}_2$ ).

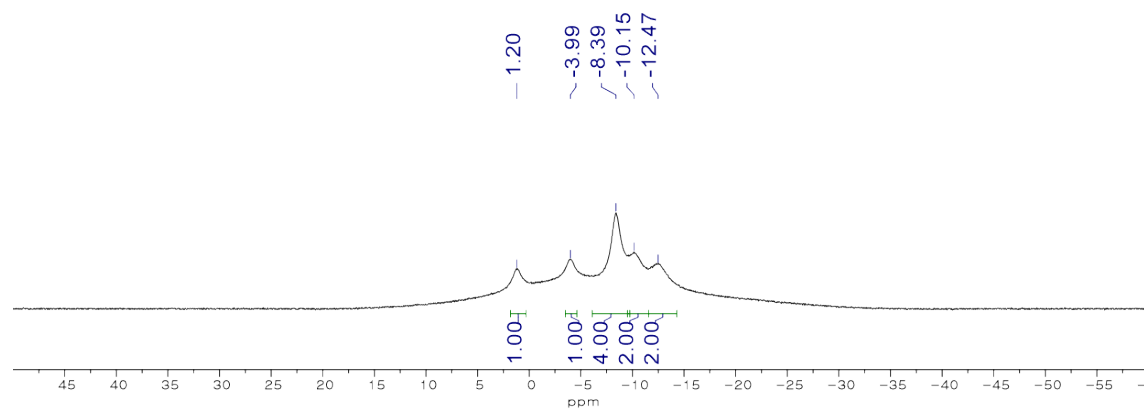

**Fig. S13**  $^{11}\text{B}\{^1\text{H}\}$  NMR spectra of **6CP** in  $\text{CD}_2\text{Cl}_2$ .

**Table S1** Crystallographic data and parameters for **1CH–6CP**

| Compound                                                        | <b>1CH</b>                                                        | <b>2CM</b>                                                          | <b>3CE</b>                                                          | <b>4CE</b>                                                          | <b>5CB</b>                                                         | <b>6CP</b>                                                          |                                                               |
|-----------------------------------------------------------------|-------------------------------------------------------------------|---------------------------------------------------------------------|---------------------------------------------------------------------|---------------------------------------------------------------------|--------------------------------------------------------------------|---------------------------------------------------------------------|---------------------------------------------------------------|
| CCDC#                                                           | 2389101                                                           | 2389102                                                             | 2389103                                                             | 2389106                                                             | 2389104                                                            | 2389105                                                             |                                                               |
| Formula                                                         | C <sub>17</sub> H <sub>24</sub> B <sub>10</sub>                   | C <sub>20</sub> H <sub>32</sub> B <sub>10</sub> Si                  | C <sub>21</sub> H <sub>34</sub> B <sub>10</sub> Si                  | C <sub>23</sub> H <sub>38</sub> B <sub>10</sub> Si                  | C <sub>23</sub> H <sub>38</sub> B <sub>10</sub> Si                 | C <sub>35</sub> H <sub>38</sub> B <sub>10</sub> Si                  |                                                               |
| Formula weight                                                  | 336.46                                                            | 408.64                                                              | 422.67                                                              | 450.72                                                              | 450.72                                                             | 594.84                                                              |                                                               |
| Crystal system                                                  | Orthorhombic                                                      | Triclinic                                                           | Triclinic                                                           | Triclinic                                                           | Monoclinic                                                         | Triclinic                                                           |                                                               |
| Space group                                                     | <i>P</i> 2 <sub>1</sub> 2 <sub>1</sub> 2 <sub>1</sub>             | <i>P</i> <sub>-1</sub>                                              | <i>P</i> <sub>-1</sub>                                              | <i>P</i> <sub>-1</sub>                                              | <i>P</i> 2 <sub>1</sub> / <i>c</i>                                 | <i>P</i> <sub>-1</sub>                                              |                                                               |
| <i>a</i> (Å)                                                    | 6.9920(2)                                                         | 9.3569(6)                                                           | 9.0417(4)                                                           | 11.0532(6)                                                          | 11.2901(6)                                                         | 11.5149(7)                                                          |                                                               |
| <i>b</i> (Å)                                                    | 10.1133(3)                                                        | 10.8812(6)                                                          | 11.2430(5)                                                          | 13.0146(6)                                                          | 9.1352(4)                                                          | 14.8401(10)                                                         |                                                               |
| <i>c</i> (Å)                                                    | 27.3441(9)                                                        | 12.1208(7)                                                          | 12.4505(6)                                                          | 19.2255(9)                                                          | 25.9770(12)                                                        | 21.6004(15)                                                         |                                                               |
| <i>α</i> (°)                                                    | 90                                                                | 98.2648(19)                                                         | 98.9030(15)                                                         | 95.7529(18)                                                         | 90                                                                 | 103.837(2)                                                          |                                                               |
| <i>β</i> (°)                                                    | 90                                                                | 94.752(2)                                                           | 93.8354(17)                                                         | 90.2216(19)                                                         | 93.4738(18)                                                        | 95.280(2)                                                           |                                                               |
| <i>γ</i> (°)                                                    | 90                                                                | 92.699(2)                                                           | 91.7182(18)                                                         | 105.5694(16)                                                        | 90                                                                 | 99.771(2)                                                           |                                                               |
| <i>V</i> (Å <sup>3</sup> )                                      | 1933.56(10)                                                       | 1214.88(12)                                                         | 1246.57(10)                                                         | 2649.4(2)                                                           | 2674.3(2)                                                          | 3497.9(4)                                                           |                                                               |
| <i>Z</i>                                                        | 4                                                                 | 2                                                                   | 2                                                                   | 4                                                                   | 4                                                                  | 4                                                                   |                                                               |
| $\rho_{\text{calc}}$ (g cm <sup>-3</sup> )                      | 1.156                                                             | 1.117                                                               | 1.126                                                               | 1.130                                                               | 1.119                                                              | 1.130                                                               |                                                               |
| $\mu$ (mm <sup>-1</sup> )                                       | 0.057                                                             | 0.103                                                               | 0.102                                                               | 0.100                                                               | 0.099                                                              | 0.092                                                               |                                                               |
| <i>F</i> (000)                                                  | 704                                                               | 432                                                                 | 448                                                                 | 960                                                                 | 960                                                                | 1248                                                                |                                                               |
| <i>T</i> (K)                                                    | 203(2)                                                            | 203(2)                                                              | 203(2)                                                              | 203(2)                                                              | 203(2)                                                             | 203(2)                                                              |                                                               |
| Scan mode                                                       | <i>φ</i> and <i>ω</i> -scan                                       | <i>φ</i> and <i>ω</i> -scan                                         | <i>φ</i> and <i>ω</i> -scan                                         | <i>φ</i> and <i>ω</i> -scan                                         | <i>φ</i> and <i>ω</i> -scan                                        | <i>φ</i> and <i>ω</i> -scan                                         |                                                               |
| <i>hkl</i> range                                                | -8 < <i>h</i> < 9,<br>-13 < <i>k</i> < 13,<br>-32 < <i>l</i> < 36 | -11 < <i>h</i> < 11,<br>-13 < <i>k</i> < 13,<br>-14 < <i>l</i> < 14 | -11 < <i>h</i> < 11,<br>-14 < <i>k</i> < 14,<br>-15 < <i>l</i> < 15 | -13 < <i>h</i> < 13,<br>-15 < <i>k</i> < 15,<br>-23 < <i>l</i> < 23 | -14 < <i>h</i> < 12,<br>-11 < <i>k</i> < 9,<br>-33 < <i>l</i> < 33 | -14 < <i>h</i> < 14,<br>-18 < <i>k</i> < 18,<br>-26 < <i>l</i> < 26 |                                                               |
| Measd rflns                                                     | 21842                                                             | 33576                                                               | 27362                                                               | 49407                                                               | 29952                                                              | 101254                                                              |                                                               |
| Unique rflns [ <i>R</i> <sub>int</sub> ]                        | 4675 [0.0686]                                                     | 4780 [0.0597]                                                       | 5432 [0.0870]                                                       | 9913 [0.1150]                                                       | 5825 [0.0911]                                                      | 13635 [0.1092]                                                      |                                                               |
| Reflns used for refinement                                      | 4675                                                              | 4780                                                                | 5432                                                                | 9913                                                                | 5825                                                               | 13635                                                               |                                                               |
| Refined parameters                                              | 246                                                               | 316                                                                 | 314                                                                 | 663                                                                 | 314                                                                | 978                                                                 |                                                               |
| <i>R</i> <sub>1</sub> <sup>a</sup> ( <i>I</i> > 2σ( <i>I</i> )) | 0.0430                                                            | 0.0450                                                              | 0.0517                                                              | 0.0649                                                              | 0.0605                                                             | 0.0680                                                              |                                                               |
| <i>wR</i> <sub>2</sub> <sup>b</sup> all data                    | 0.1122                                                            | 0.1229                                                              | 0.1424                                                              | 0.1526                                                              | 0.1373                                                             | 0.1368                                                              |                                                               |
| GOF on <i>F</i> <sup>2</sup>                                    | 1.052                                                             | 1.021                                                               | 1.030                                                               | 1.047                                                               | 1.070                                                              | 1.084                                                               |                                                               |
| $\rho_{\text{fin}}$ (max/min) (e Å <sup>-3</sup> )              | 0.165, -0.232                                                     | 0.219, -0.390                                                       | 0.587, -0.356                                                       | 0.216, -0.329                                                       | 0.263, -0.261                                                      | 0.275, -0.290                                                       |                                                               |
| <sup>a</sup> <i>R</i> <sub>1</sub>                              | =                                                                 | $\frac{\sum  F_o }{\sum  F_c }$                                     | -                                                                   | $\frac{ F_c }{\sum  F_o }$                                          | <sup>b</sup> <i>wR</i> <sub>2</sub>                                | =                                                                   | $\frac{\{\sum w(F_o^2 - F_c^2)^2\}}{[\sum w(F_o^2)^2]}^{1/2}$ |

**Table S2** Selected bond lengths (Å) and angles (°) for **1CH–6CP**

| Compound    | <b>1CH</b> | <b>2CM</b> | <b>3CE</b> | <b>4CE</b> | <b>5CB</b> | <b>6CP</b> |
|-------------|------------|------------|------------|------------|------------|------------|
|             |            |            | length (Å) |            |            |            |
| C2–C14      | 1.502(3)   | 1.501(2)   | 1.507(2)   | 1.505(4)   | 1.503(3)   | 1.506(3)   |
| C9–C10      | 1.524(3)   | 1.520(2)   | 1.524(2)   | 1.525(4)   | 1.519(3)   | 1.523(4)   |
| C9–C13      | 1.521(3)   | 1.519(2)   | 1.524(3)   | 1.524(4)   | 1.523(3)   | 1.520(4)   |
| C14–C15     | 1.645(3)   | 1.708(2)   | 1.710(2)   | 1.727(4)   | 1.739(3)   | 1.758(3)   |
| C15–Si      | –          | 1.9340(16) | 1.9368(18) | 1.944(3)   | 1.949(2)   | 1.945(3)   |
|             |            |            | angles (°) |            |            |            |
| C1–C2–C14   | 117.64(18) | 119.39(14) | 119.42(16) | 120.9(2)   | 118.91(19) | 120.4(2)   |
| C2–C14–C15  | 120.07(16) | 120.08(12) | 119.83(14) | 121.3(2)   | 120.04(17) | 121.2(2)   |
| C9–C10–C11  | 111.21(17) | 111.11(14) | 110.99(15) | 110.8(2)   | 111.15(18) | 111.0(2)   |
| C9–C13–C12  | 111.37(17) | 111.34(14) | 111.60(15) | 111.6(2)   | 111.23(19) | 111.4(2)   |
| C10–C9–C13  | 100.94(16) | 101.00(13) | 100.84(15) | 100.7(2)   | 100.96(17) | 101.0(2)   |
| C10–C11–C12 | 108.22(17) | 108.21(14) | 108.40(16) | 108.4(2)   | 108.35(19) | 108.5(2)   |
| C11–C12–C13 | 108.23(18) | 108.32(14) | 108.11(16) | 108.4(2)   | 108.3(2)   | 108.0(2)   |
| C14–C15–Si  | –          | 122.37(10) | 121.74(11) | 124.08(17) | 120.66(14) | 123.10(16) |



Theoretical calculation results for the *o*-carboranyl compounds

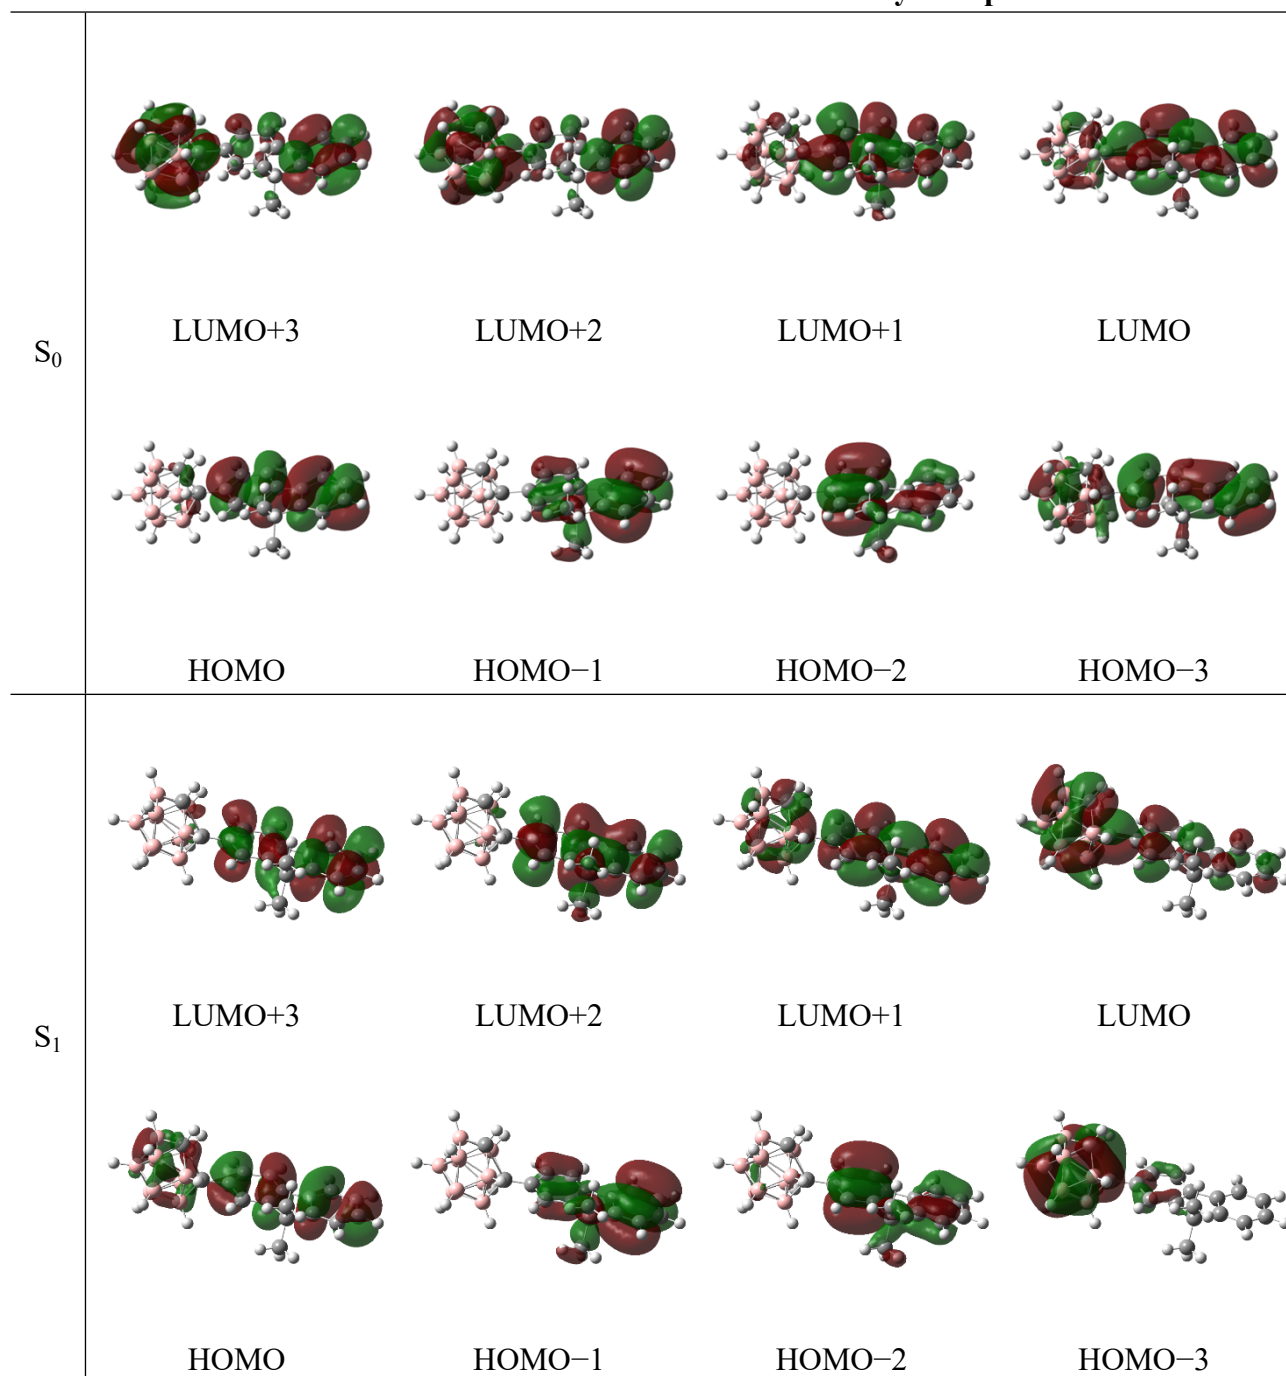

**Fig. S14** Selected frontier orbitals of **1CH** from CAM-B3LYP calculations (Isovalue = 0.02 a.u.) at the ground state (S<sub>0</sub>) and first singlet excited state (S<sub>1</sub>) optimized geometries in THF.

**Table S3** Computed absorption wavelengths ( $\lambda_{\text{calc}}$  in nm) and oscillator strengths ( $f_{\text{calc}}$ ) for **1CH** from TD-CAM-B3LYP calculations using the CAM-B3LYP geometries at the ground state ( $S_0$ ) and first singlet excited state ( $S_1$ ) optimized geometries in THF

| state | $\lambda_{\text{calc}}$<br>(/nm) | $f_{\text{calc}}$ | Major contribution                                                                                                                   |
|-------|----------------------------------|-------------------|--------------------------------------------------------------------------------------------------------------------------------------|
| $S_0$ |                                  |                   |                                                                                                                                      |
| 1     | 264.85                           | 0.7989            | HOMO → LUMO (91.21%)                                                                                                                 |
| 2     | 245.53                           | 0.0325            | HOMO-2 → LUMO (35.09%)<br>HOMO → LUMO+1 (52.03%)                                                                                     |
| 3     | 239.60                           | 0.0277            | HOMO-1 → LUMO (54.01%)<br>HOMO → LUMO+3 (24.65%)                                                                                     |
| 4     | 207.27                           | 0.1670            | HOMO-2 → LUMO (51.36%)<br>HOMO → LUMO+1 (35.66%)                                                                                     |
| 5     | 198.78                           | 0.0251            | HOMO-3 → LUMO (18.22%)<br>HOMO-2 → LUMO+1 (10.06%)<br>HOMO-1 → LUMO+1 (27.81%)<br>HOMO-1 → LUMO+3 (11.04%)<br>HOMO → LUMO+4 (11.17%) |
| $S_1$ |                                  |                   |                                                                                                                                      |
| 1     | 435.63                           | 0.2138            | HOMO → LUMO (93.20%)                                                                                                                 |
| 2     | 320.68                           | 0.0007            | HOMO-1 → LUMO (85.81%)                                                                                                               |
| 3     | 443.77                           | 0.4609            | HOMO-2 → LUMO (71.21%)<br>HOMO-1 → LUMO (13.77%)                                                                                     |
| 4     | 352.46                           | 0.0001            | HOMO-3 → LUMO (8.40%)<br>HOMO-2 → LUMO (58.39%)<br>HOMO-1 → LUMO+1 (9.93%)                                                           |
| 5     | 349.93                           | 0.0613            | HOMO-6 → LUMO (20.84%)<br>HOMO-5 → LUMO (14.13%)<br>HOMO-3 → LUMO (23.84%)<br>HOMO → LUMO+1 (21.72%)                                 |

**Table S4** Molecular orbital energies (in eV) and molecular orbital distributions (in %) of **1CH** at the ground state ( $S_0$ ) and first singlet excited state ( $S_1$ ) optimized geometries in THF.

|        | E (eV) | fluorene | carborane | terminal-H |
|--------|--------|----------|-----------|------------|
| $S_0$  |        |          |           |            |
| LUMO+3 | 1.19   | 45.07    | 54.84     | 0.08       |
| LUMO+2 | 1.18   | 52.99    | 46.94     | 0.06       |
| LUMO+1 | 0.59   | 91.07    | 8.83      | 0.10       |
| LUMO   | -0.27  | 88.25    | 11.66     | 0.09       |
| HOMO   | -7.55  | 96.59    | 3.36      | 0.05       |
| HOMO-1 | -8.39  | 99.90    | 0.10      | 0.00       |
| HOMO-2 | -8.67  | 98.72    | 1.28      | 0.00       |
| HOMO-3 | -9.46  | 81.63    | 18.34     | 0.03       |
| $S_1$  |        |          |           |            |
| LUMO+3 | 1.18   | 95.14    | 4.86      | 0.00       |
| LUMO+2 | 0.64   | 95.61    | 4.39      | 0.00       |
| LUMO+1 | -0.05  | 83.32    | 16.58     | 0.11       |
| LUMO   | -2.18  | 25.35    | 74.24     | 0.41       |
| HOMO   | -7.32  | 90.08    | 9.90      | 0.03       |
| HOMO-1 | -8.58  | 99.71    | 0.29      | 0.00       |
| HOMO-2 | -8.86  | 96.83    | 3.17      | 0.00       |
| HOMO-3 | -9.31  | 4.46     | 95.52     | 0.02       |

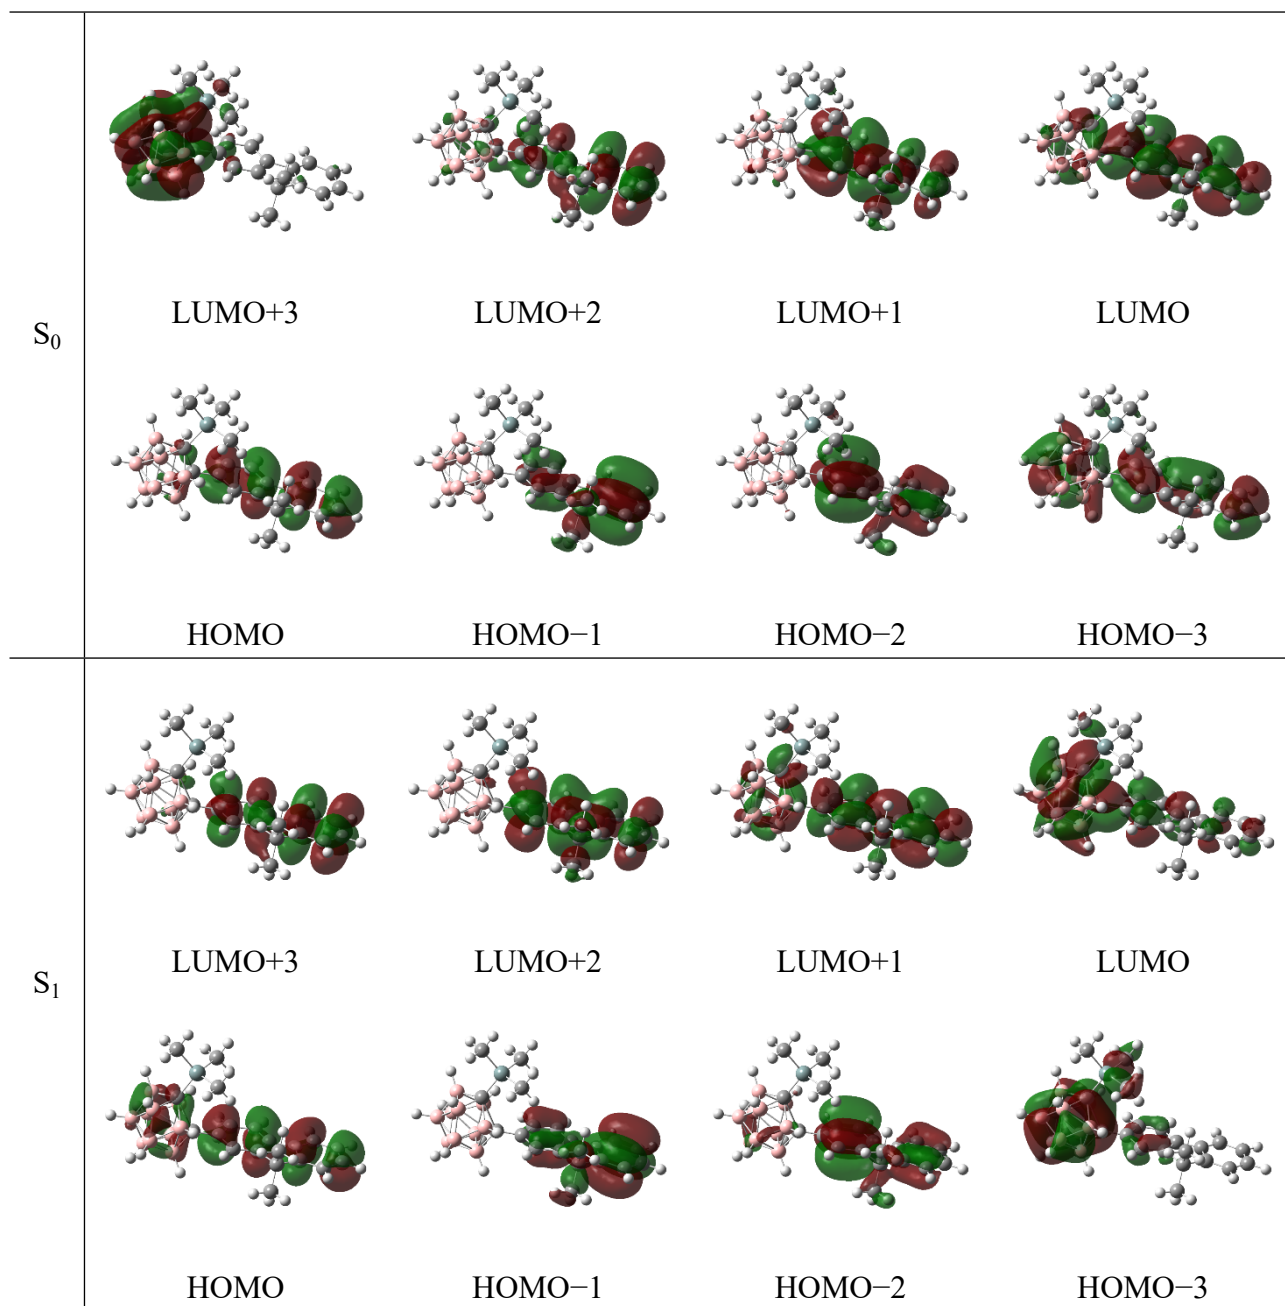

**Fig. S15** Selected frontier orbitals of **2CM** from CAM-B3LYP calculations (Isovalue = 0.02 a.u.) at the ground state ( $S_0$ ) and first singlet excited state ( $S_1$ ) optimized geometries in THF.

**Table S5** Computed absorption wavelengths ( $\lambda_{\text{calc}}$  in nm) and oscillator strengths ( $f_{\text{calc}}$ ) for **2CM** from TD-CAM-B3LYP calculations using the CAM-B3LYP geometries at the ground state ( $S_0$ ) and first singlet excited state ( $S_1$ ) optimized geometries in THF.

| state | $\lambda_{\text{calc}}$<br>(/nm) | $f_{\text{calc}}$ | Major contribution |                   |
|-------|----------------------------------|-------------------|--------------------|-------------------|
| $S_0$ |                                  |                   |                    |                   |
| 1     | 267.09                           | 0.0858            | HOMO               | → LUMO (91.52%)   |
| 2     | 246.49                           | 0.0302            | HOMO-2             | → LUMO (36.41%)   |
|       |                                  |                   | HOMO               | LUMO+1 (50.95%)   |
| 3     | 240.19                           | 0.0260            | HOMO-1             | → LUMO (53.73%)   |
|       |                                  |                   | HOMO               | LUMO+3 (14.77%)   |
|       |                                  |                   | HOMO               | LUMO+4 (12.09%)   |
| 4     | 208.34                           | 0.1664            | HOMO-2             | → LUMO (51.71%)   |
|       |                                  |                   | HOMO               | → LUMO+1 (36.89%) |
| 5     | 199.67                           | 0.0159            | HOMO-3             | → LUMO (20.32%)   |
|       |                                  |                   | HOMO-2             | → LUMO+1 (8.45%)  |
|       |                                  |                   | HOMO-1             | → LUMO+1 (26.56%) |
|       |                                  |                   | HOMO               | LUMO+3 (13.39%)   |
| $S_1$ |                                  |                   |                    |                   |
| 1     | 434.57                           | 1.0396            | HOMO               | → LUMO (92.95%)   |
| 2     | 325.77                           | 0.0030            | HOMO-1             | → LUMO (82.90%)   |
| 3     | 302.80                           | 0.0240            | HOMO-2             | → LUMO (72.91%)   |
|       |                                  |                   | HOMO-1             | → LUMO (13.96%)   |
| 4     | 289.19                           | 0.0215            | HOMO-3             | → LUMO (93.97%)   |
| 5     | 274.84                           | 0.0469            | HOMO-3             | → LUMO (7.86%)    |
|       |                                  |                   | HOMO-1             | → LUMO (51.89%)   |
|       |                                  |                   | HOMO-1             | → LUMO+1 (9.45%)  |
|       |                                  |                   | HOMO               | → LUMO+1 (12.26%) |

**Table S6** Molecular orbital energies (in eV) and molecular orbital distributions (in %) of **2CM** at the ground state ( $S_0$ ) and first singlet excited state ( $S_1$ ) optimized geometries in THF.

|        | E (eV) | fluorene | carborane | silyl |
|--------|--------|----------|-----------|-------|
| $S_0$  |        |          |           |       |
| LUMO+3 | 1.28   | 3.35     | 92.89     | 3.76  |
| LUMO+2 | 1.20   | 93.75    | 5.70      | 0.55  |
| LUMO+1 | 0.61   | 93.41    | 5.66      | 0.93  |
| LUMO   | -0.28  | 87.74    | 11.77     | 0.39  |
| HOMO   | -7.52  | 95.78    | 3.92      | 0.30  |
| HOMO-1 | -8.39  | 99.70    | 0.17      | 0.13  |
| HOMO-2 | -8.64  | 97.60    | 1.34      | 1.06  |
| HOMO-3 | -9.38  | 73.62    | 24.84     | 1.54  |
| $S_1$  |        |          |           |       |
| LUMO+3 | 1.21   | 95.26    | 4.36      | 0.38  |
| LUMO+2 | 0.67   | 95.21    | 4.35      | 0.43  |
| LUMO+1 | -0.05  | 83.38    | 15.19     | 1.43  |
| LUMO   | -2.11  | 23.16    | 74.26     | 2.58  |
| HOMO   | -7.26  | 90.28    | 9.48      | 0.24  |
| HOMO-1 | -8.54  | 99.61    | 0.35      | 0.04  |
| HOMO-2 | -8.81  | 95.51    | 4.13      | 0.36  |
| HOMO-3 | -9.15  | 6.01     | 86.99     | 7.00  |

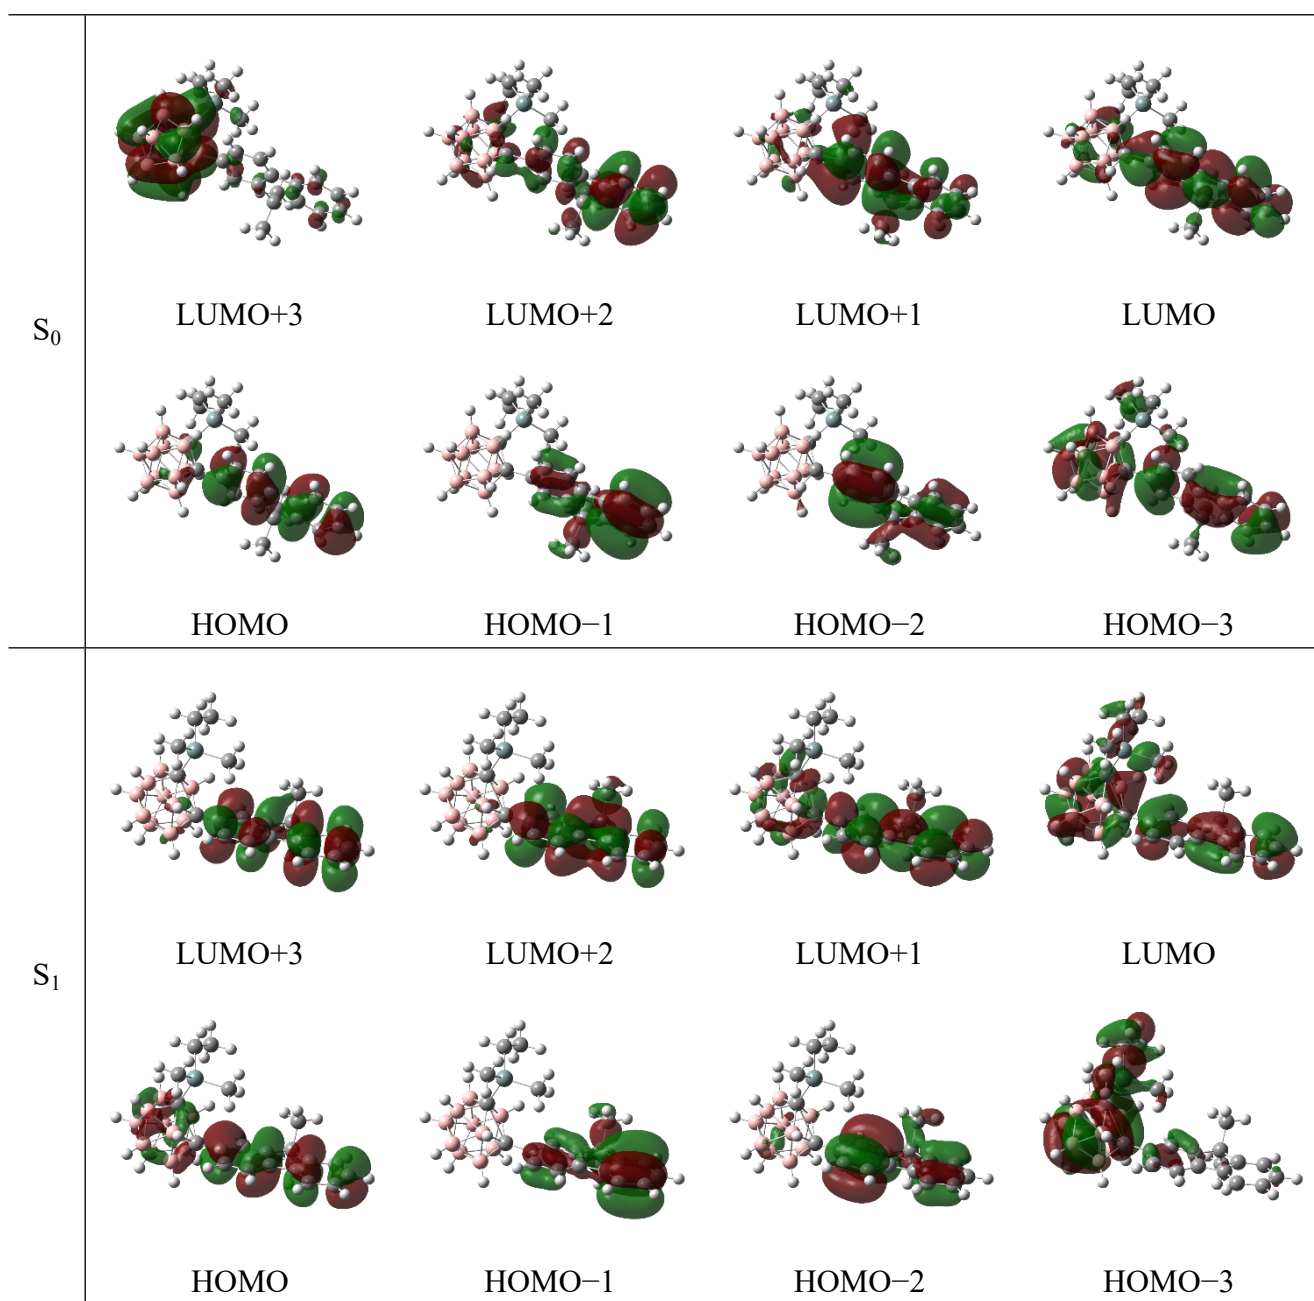

**Fig. S16** Selected frontier orbitals of **3CE** from CAM-B3LYP calculations (Isovalue = 0.02 a.u.) at the ground state (S<sub>0</sub>) and first singlet excited state (S<sub>1</sub>) optimized geometries in THF.

**Table S7** Computed absorption wavelengths ( $\lambda_{\text{calc}}$  in nm) and oscillator strengths ( $f_{\text{calc}}$ ) for **3CE** from TD-CAM-B3LYP calculations using the CAM-B3LYP geometries at the ground state ( $S_0$ ) and first singlet excited state ( $S_1$ ) optimized geometries in THF.

| state | $\lambda_{\text{calc}}$<br>(/nm) | $f_{\text{calc}}$ | Major contribution                                                                                                                                                                             |
|-------|----------------------------------|-------------------|------------------------------------------------------------------------------------------------------------------------------------------------------------------------------------------------|
| $S_0$ |                                  |                   |                                                                                                                                                                                                |
| 1     | 266.08                           | 0.8047            | HOMO $\rightarrow$ LUMO (91.40%)                                                                                                                                                               |
| 2     | 246.56                           | 0.0270            | HOMO-2 $\rightarrow$ LUMO (35.20%)<br>HOMO $\rightarrow$ LUMO+1 (51.50%)                                                                                                                       |
| 3     | 239.86                           | 0.0256            | HOMO $\rightarrow$ LUMO (53.58%)<br>HOMO $\rightarrow$ LUMO+3 (18.82%)<br>HOMO $\rightarrow$ LUMO+4 (9.29%)                                                                                    |
| 4     | 208.10                           | 0.1791            | HOMO-2 $\rightarrow$ LUMO (52.51%)<br>HOMO $\rightarrow$ LUMO+1 (35.61%)                                                                                                                       |
| 5     | 199.76                           | 0.0285            | HOMO-3 $\rightarrow$ LUMO (18.05%)<br>HOMO-2 $\rightarrow$ LUMO+1 (9.31%)<br>HOMO-1 $\rightarrow$ LUMO+1 (24.58%)<br>HOMO-1 $\rightarrow$ LUMO+3 (8.88%)<br>HOMO $\rightarrow$ LUMO+3 (13.61%) |
| $S_1$ |                                  |                   |                                                                                                                                                                                                |
| 1     | 438.38                           | 1.0283            | HOMO $\rightarrow$ LUMO (93.03%)                                                                                                                                                               |
| 2     | 327.40                           | 0.0019            | HOMO-2 $\rightarrow$ LUMO (32.68%)<br>HOMO-1 $\rightarrow$ LUMO (50.54%)                                                                                                                       |
| 3     | 304.74                           | 0.0213            | HOMO-2 $\rightarrow$ LUMO (73.55%)<br>HOMO-1 $\rightarrow$ LUMO (14.16%)                                                                                                                       |
| 4     | 293.35                           | 0.0304            | HOMO-3 $\rightarrow$ LUMO (57.58%)<br>HOMO-2 $\rightarrow$ LUMO (29.77%)                                                                                                                       |
| 5     | 275.87                           | 0.0534            | HOMO-2 $\rightarrow$ LUMO (6.16%)<br>HOMO-1 $\rightarrow$ LUMO (51.14%)<br>HOMO-1 $\rightarrow$ LUMO+1 (8.79%)<br>HOMO $\rightarrow$ LUMO+1 (11.10%)                                           |



**Table S8** Molecular orbital energies (in eV) and molecular orbital distributions (in %) of **3CE** at the ground state ( $S_0$ ) and first singlet excited state ( $S_1$ ) optimized geometries in THF.

|        | E (eV) | fluorene | carborane | silyl |
|--------|--------|----------|-----------|-------|
| $S_0$  |        |          |           |       |
| LUMO+3 | 1.26   | 5.44     | 89.68     | 4.88  |
| LUMO+2 | 1.19   | 90.17    | 8.60      | 1.23  |
| LUMO+1 | 0.59   | 90.47    | 7.82      | 1.71  |
| LUMO   | -0.26  | 87.49    | 11.82     | 0.68  |
| HOMO   | -7.52  | 95.83    | 3.85      | 0.32  |
| HOMO-1 | -8.38  | 99.78    | 0.14      | 0.08  |
| HOMO-2 | -8.64  | 97.89    | 1.51      | 0.60  |
| HOMO-3 | -9.37  | 72.23    | 22.65     | 5.12  |
| $S_1$  |        |          |           |       |
| LUMO+3 | 1.22   | 95.09    | 4.52      | 0.39  |
| LUMO+2 | 0.68   | 95.15    | 4.37      | 0.48  |
| LUMO+1 | -0.04  | 84.02    | 14.80     | 1.18  |
| LUMO   | -2.13  | 22.81    | 74.63     | 2.56  |
| HOMO   | -7.25  | 90.19    | 9.49      | 0.31  |
| HOMO-1 | -8.53  | 99.61    | 0.31      | 0.07  |
| HOMO-2 | -8.80  | 95.61    | 3.63      | 0.76  |
| HOMO-3 | -9.12  | 6.38     | 67.25     | 26.36 |

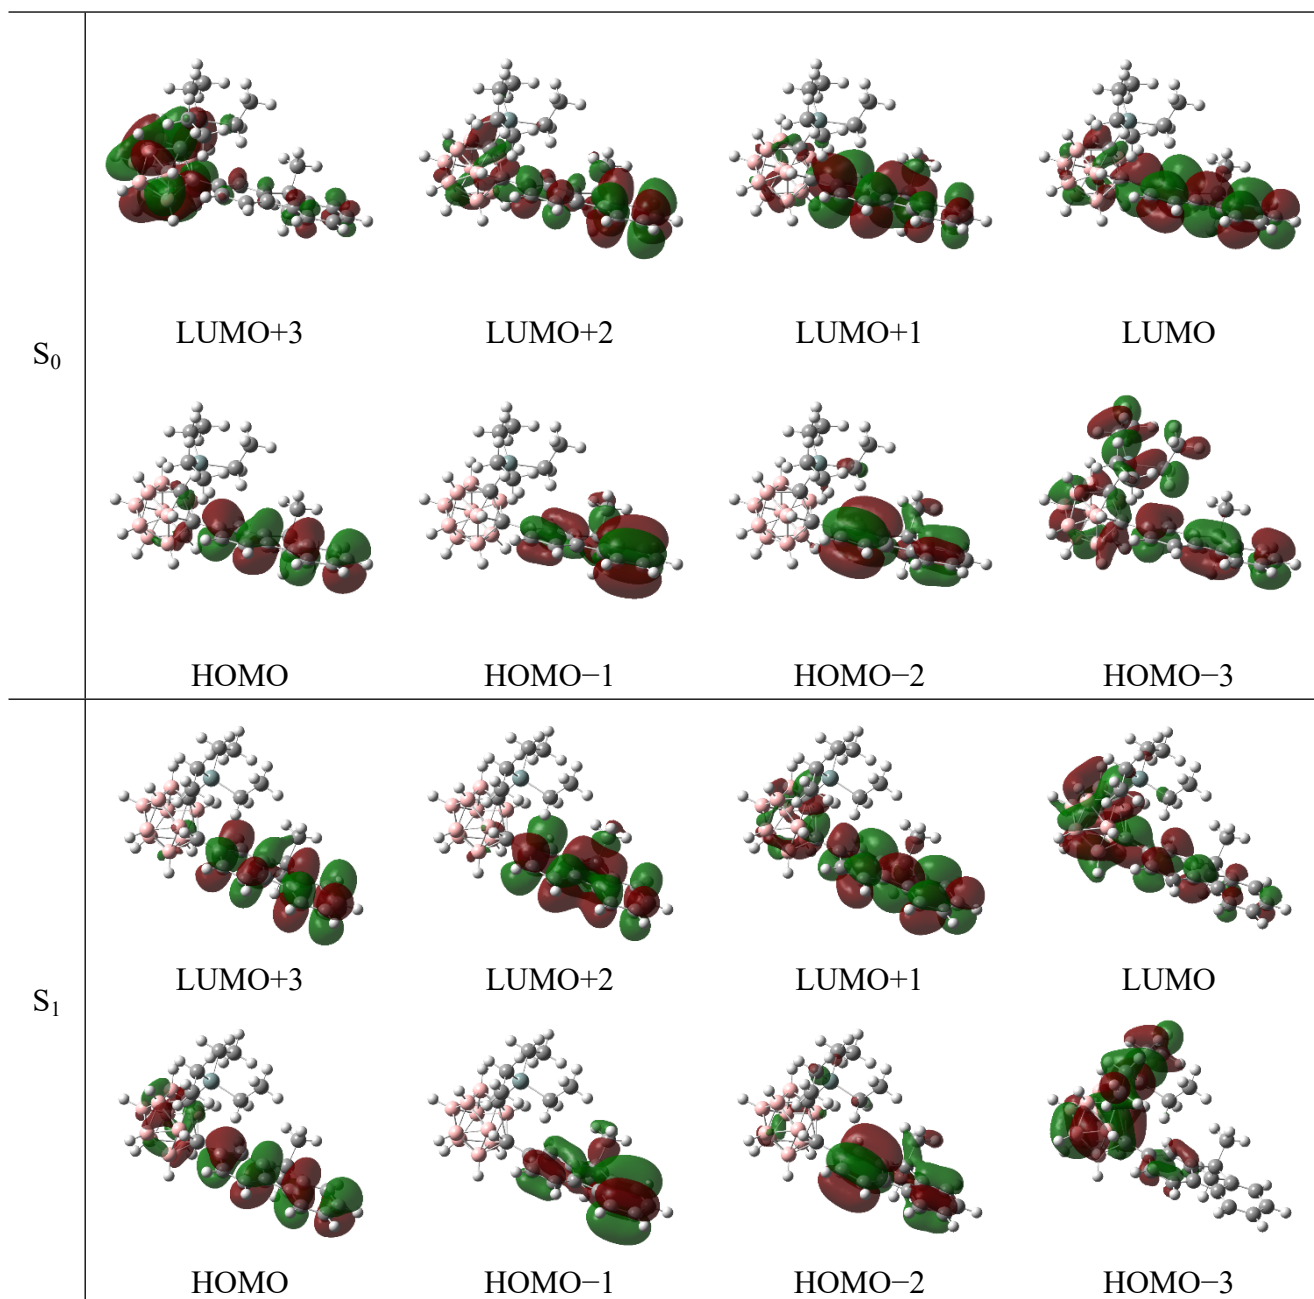

**Fig. S17** Selected frontier orbitals of **4CE** from CAM-B3LYP calculations (Isovalue = 0.02 a.u.) at the ground state (S<sub>0</sub>) and first singlet excited state (S<sub>1</sub>) optimized geometries in THF.

**Table S9** Computed absorption wavelengths ( $\lambda_{\text{calc}}$  in nm) and oscillator strengths ( $f_{\text{calc}}$ ) for **4CE** from TD-CAM-B3LYP calculations using the CAM-B3LYP geometries at the ground state ( $S_0$ ) and first singlet excited state ( $S_1$ ) optimized geometries in THF.

| state | $\lambda_{\text{calc}}$<br>(/nm) | $f_{\text{calc}}$ | Major contribution                                                                                    |
|-------|----------------------------------|-------------------|-------------------------------------------------------------------------------------------------------|
| $S_0$ |                                  |                   |                                                                                                       |
| 1     | 267.06                           | 0.7977            | HOMO → LUMO (91.24%)                                                                                  |
| 2     | 247.02                           | 0.0270            | HOMO-2 → LUMO (35.60%)<br>HOMO → LUMO+1 (49.96%)                                                      |
| 3     | 240.12                           | 0.0247            | HOMO-1 → LUMO (52.99%)<br>HOMO → LUMO+3 (9.37%)<br>HOMO → LUMO+4 (18.37%)                             |
| 4     | 208.72                           | 0.1755            | HOMO-2 → LUMO (52.91%)<br>HOMO → LUMO+1 (36.16%)                                                      |
| 5     | 200.52                           | 0.0251            | HOMO-5 → LUMO (10.54%)<br>HOMO-3 → LUMO (9.69%)<br>HOMO-1 → LUMO+1 (22.58%)<br>HOMO → LUMO+3 (20.45%) |
| $S_1$ |                                  |                   |                                                                                                       |
| 1     | 441.78                           | 0.9949            | HOMO → LUMO (92.97%)                                                                                  |
| 2     | 331.83                           | 0.0016            | HOMO-2 → LUMO (44.76%)<br>HOMO-1 → LUMO (40.24%)                                                      |
| 3     | 306.46                           | 0.0199            | HOMO-2 → LUMO (73.16%)<br>HOMO-1 → LUMO (14.38%)                                                      |
| 4     | 297.77                           | 0.0273            | HOMO-3 → LUMO (86.14%)                                                                                |
| 5     | 278.56                           | 0.1269            | HOMO-3 → LUMO (19.33%)<br>HOMO-1 → LUMO (24.12%)<br>HOMO → LUMO+1 (8.47%)                             |

**Table S10** Molecular orbital energies (in eV) and molecular orbital distributions (in %) of **4CE** at the ground state ( $S_0$ ) and first singlet excited state ( $S_1$ ) optimized geometries in THF.

|        | E (eV) | fluorene | carborane | silyl |
|--------|--------|----------|-----------|-------|
| $S_0$  |        |          |           |       |
| LUMO+3 | 1.24   | 8.14     | 85.88     | 5.98  |
| LUMO+2 | 1.18   | 85.97    | 11.75     | 2.28  |
| LUMO+1 | 0.60   | 89.99    | 7.73      | 2.28  |
| LUMO   | -0.27  | 86.05    | 12.94     | 1.01  |
| HOMO   | -7.51  | 95.68    | 3.99      | 0.33  |
| HOMO-1 | -8.38  | 99.60    | 0.18      | 0.22  |
| HOMO-2 | -8.61  | 96.38    | 1.55      | 2.07  |
| HOMO-3 | -9.31  | 48.53    | 18.85     | 32.61 |
| $S_1$  |        |          |           |       |
| LUMO+3 | 1.22   | 94.96    | 4.52      | 0.52  |
| LUMO+2 | 0.68   | 94.99    | 4.37      | 0.64  |
| LUMO+1 | -0.04  | 84.58    | 14.26     | 1.16  |
| LUMO   | -2.16  | 22.04    | 75.30     | 2.66  |
| HOMO   | -7.25  | 90.08    | 9.43      | 0.49  |
| HOMO-1 | -8.53  | 99.55    | 0.31      | 0.14  |
| HOMO-2 | -8.78  | 93.61    | 3.95      | 2.44  |
| HOMO-3 | -9.04  | 5.69     | 47.60     | 46.72 |

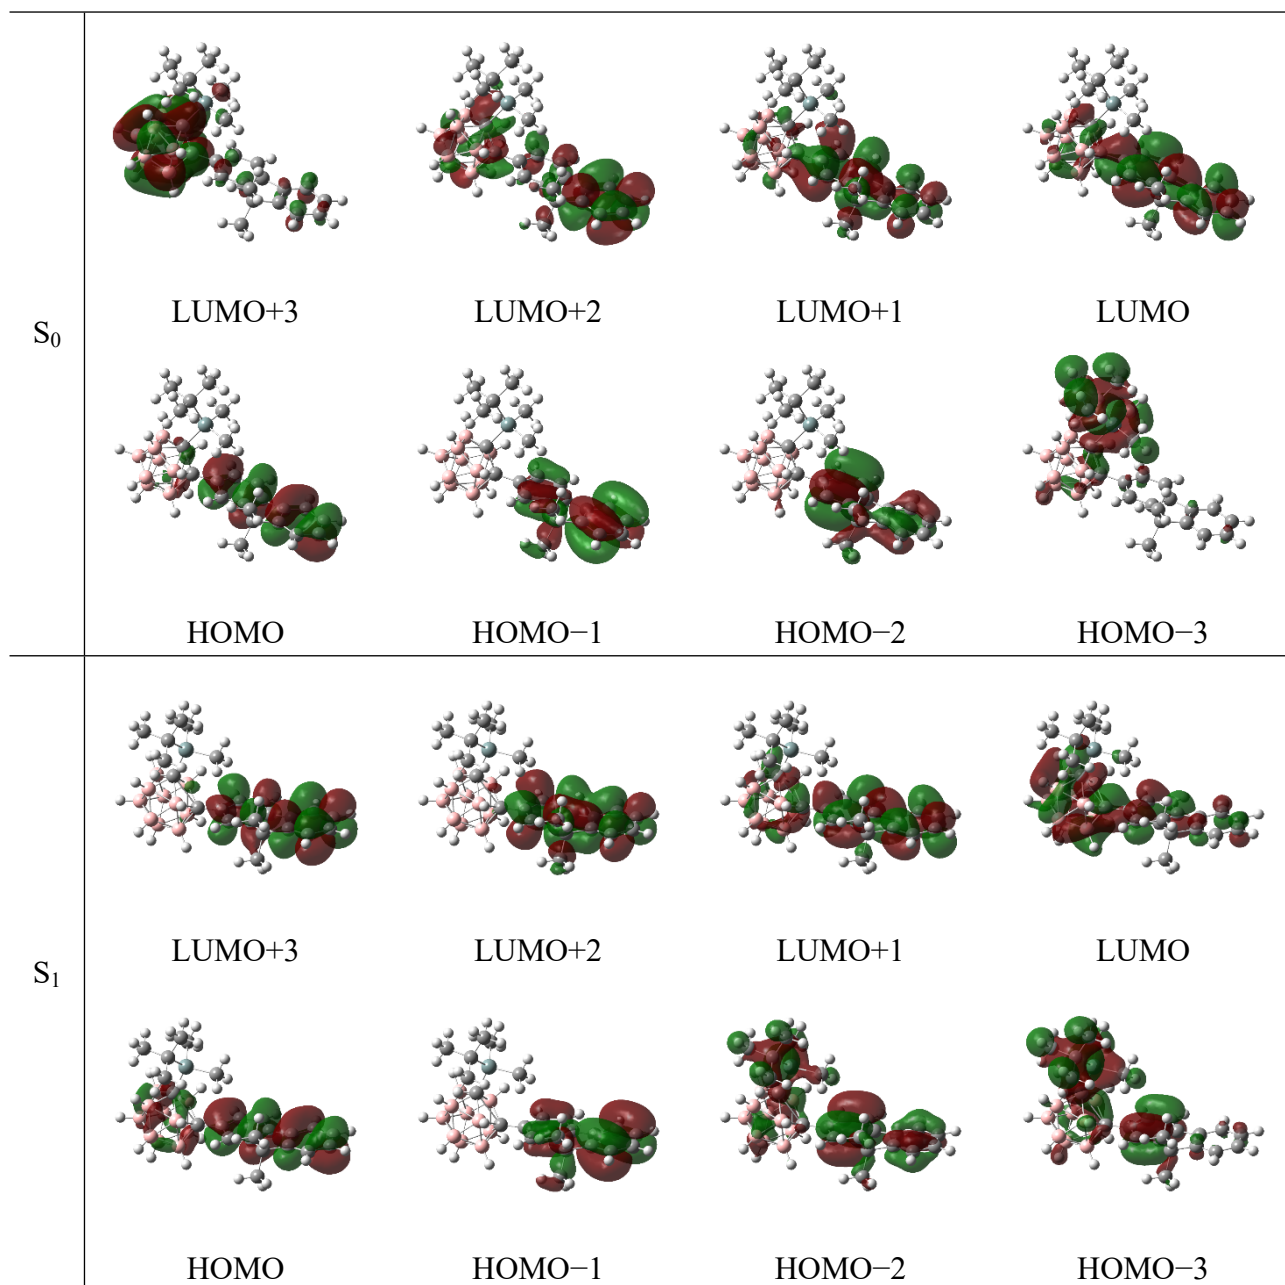

**Figure S18** Selected frontier orbitals of **5CB** from CAM-B3LYP calculations (Isovalue = 0.02 a.u.) at the ground state (S<sub>0</sub>) and first singlet excited state (S<sub>1</sub>) optimized geometries in THF.

**Table S11** Computed absorption wavelengths ( $\lambda_{\text{calc}}$  in nm) and oscillator strengths ( $f_{\text{calc.}}$ ) for **5CB** from TD-CAM-B3LYP calculations using the CAM-B3LYP geometries at the ground state ( $S_0$ ) and first singlet excited state ( $S_1$ ) optimized geometries in THF.

| state | $\lambda_{\text{calc}}$<br>(/nm) | $f_{\text{calc}}$ | Major contribution                                                                                  |
|-------|----------------------------------|-------------------|-----------------------------------------------------------------------------------------------------|
| $S_0$ |                                  |                   |                                                                                                     |
| 1     | 267.10                           | 0.8198            | HOMO → LUMO (91.38%)                                                                                |
| 2     | 247.04                           | 0.0249            | HOMO-2 → LUMO (36.02%)<br>HOMO → LUMO+1 (49.72%)                                                    |
| 3     | 240.09                           | 0.0251            | HOMO → LUMO (52.99%)<br>HOMO → LUMO+3 (9.61%)<br>HOMO → LUMO+4 (18.27%)                             |
| 4     | 208.56                           | 0.1802            | HOMO-2 → LUMO (52.23%)<br>HOMO → LUMO+1 (35.81%)                                                    |
| 5     | 200.64                           | 0.0341            | HOMO-4 → LUMO (19.01%)<br>HOMO-1 → LUMO+1 (20.70%)<br>HOMO → LUMO+3 (22.68%)                        |
| $S_1$ |                                  |                   |                                                                                                     |
| 1     | 443.99                           | 0.9966            | HOMO → LUMO (93.00%)                                                                                |
| 2     | 333.61                           | 0.0047            | HOMO-2 → LUMO (61.51%)<br>HOMO-1 → LUMO (15.66%)                                                    |
| 3     | 307.13                           | 0.0200            | HOMO-3 → LUMO (11.54%)<br>HOMO-2 → LUMO (65.49%)<br>HOMO-1 → LUMO (14.14%)                          |
| 4     | 299.74                           | 0.0539            | HOMO-6 → LUMO (48.20%)<br>HOMO-5 → LUMO (19.15%)<br>HOMO-3 → LUMO (22.08%)                          |
| 5     | 280.17                           | 0.0793            | HOMO-6 → LUMO (22.48%)<br>HOMO-4 → LUMO (9.42%)<br>HOMO-3 → LUMO (29.83%)<br>HOMO-1 → LUMO (12.66%) |

**Table S12** Molecular orbital energies (in eV) and molecular orbital distributions (in %) of **5CB** at the ground state ( $S_0$ ) and first singlet excited state ( $S_1$ ) optimized geometries in THF.

|        | E (eV) | fluorene | carborane | silyl |
|--------|--------|----------|-----------|-------|
| $S_0$  |        |          |           |       |
| LUMO+3 | 1.25   | 6.96     | 88.38     | 4.67  |
| LUMO+2 | 1.17   | 81.19    | 16.28     | 2.53  |
| LUMO+1 | 0.59   | 89.45    | 8.50      | 2.05  |
| LUMO   | -0.28  | 85.71    | 13.39     | 0.90  |
| HOMO   | -7.51  | 95.63    | 3.99      | 0.38  |
| HOMO-1 | -8.38  | 99.76    | 0.14      | 0.10  |
| HOMO-2 | -8.63  | 97.60    | 1.52      | 0.88  |
| HOMO-3 | -9.08  | 2.95     | 8.00      | 89.05 |
| $S_1$  |        |          |           |       |
| LUMO+3 | 1.22   | 95.11    | 4.44      | 0.45  |
| LUMO+2 | 0.68   | 95.04    | 4.38      | 0.58  |
| LUMO+1 | -0.04  | 84.87    | 13.88     | 1.25  |
| LUMO   | -2.18  | 21.64    | 75.49     | 2.87  |
| HOMO   | -7.24  | 90.12    | 9.40      | 0.49  |
| HOMO-1 | -8.52  | 99.39    | 0.34      | 0.27  |
| HOMO-2 | -8.78  | 65.19    | 9.48      | 25.33 |
| HOMO-3 | -8.83  | 33.98    | 11.60     | 54.42 |

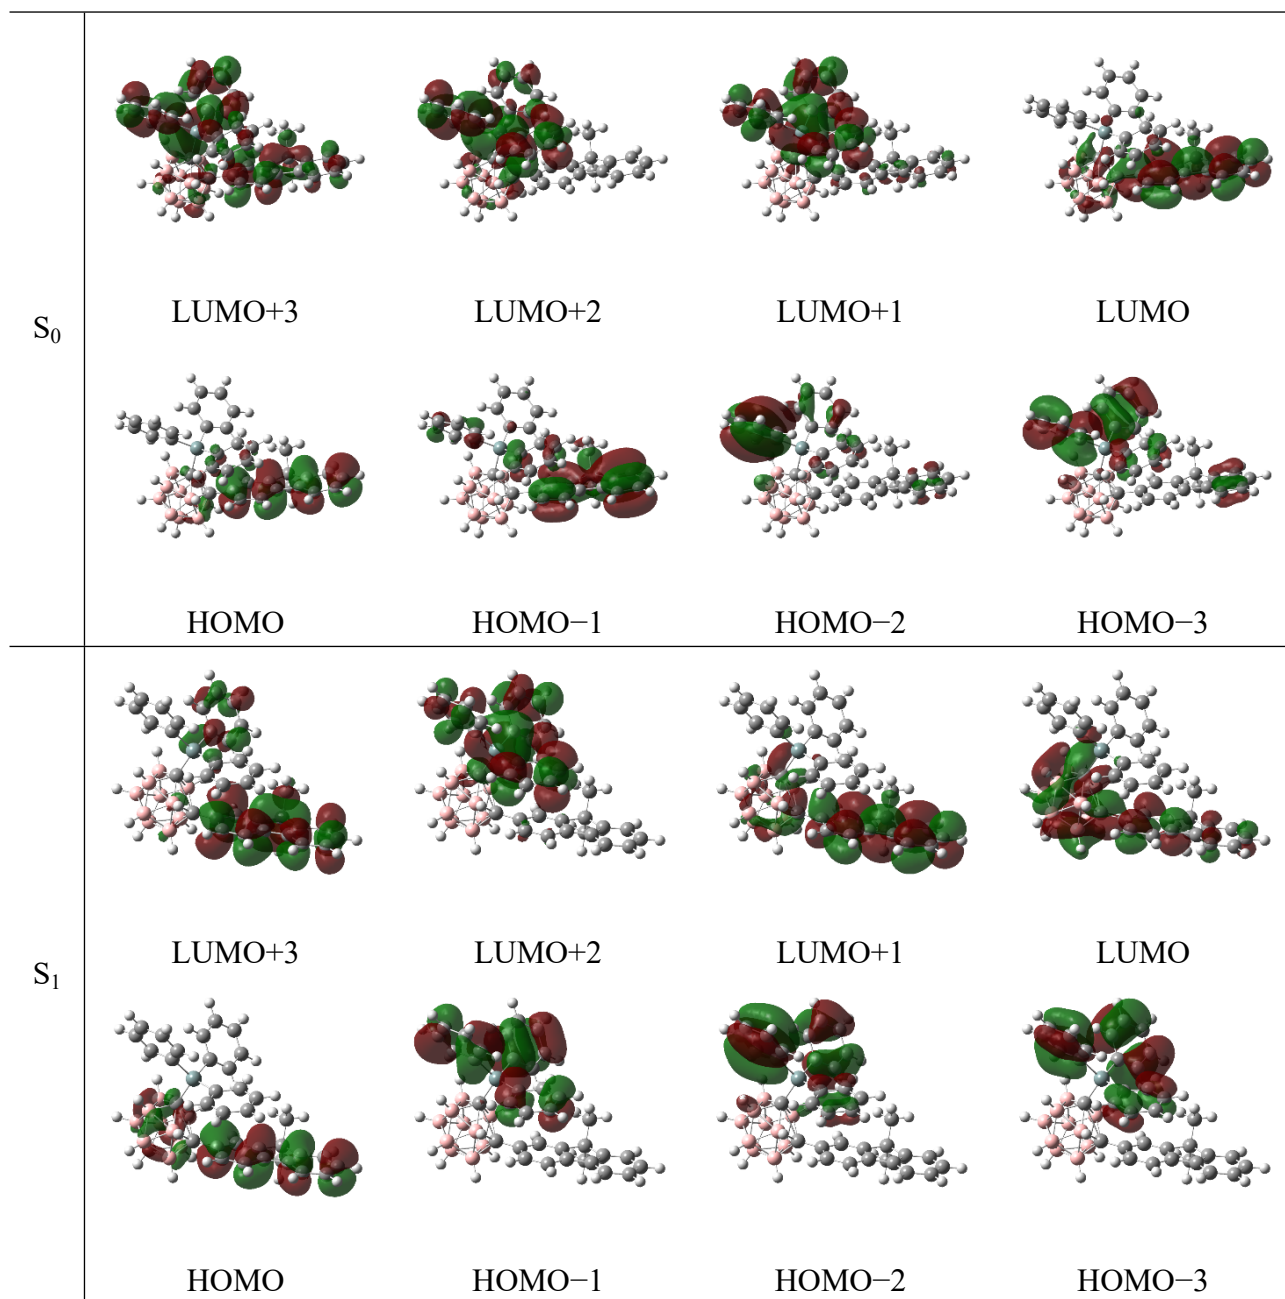

**Fig. S19** Selected frontier orbitals of **6CP** from CAM-B3LYP calculations (Isovalue = 0.02 a.u.) at the ground state (S<sub>0</sub>) and first singlet excited state (S<sub>1</sub>) optimized geometries in THF.



**Table S13** Computed absorption wavelengths ( $\lambda_{\text{calc}}$  in nm) and oscillator strengths ( $f_{\text{calc.}}$ ) for **6CP** from TD-CAM-B3LYP calculations using the CAM-B3LYP geometries at the ground state ( $S_0$ ) and first singlet excited state ( $S_1$ ) optimized geometries in THF.

| state | $\lambda_{\text{calc}}$<br>(/nm) | $f_{\text{calc}}$ | Major contribution                                                                                                                                                                          |
|-------|----------------------------------|-------------------|---------------------------------------------------------------------------------------------------------------------------------------------------------------------------------------------|
| $S_0$ |                                  |                   |                                                                                                                                                                                             |
| 1     | 269.51                           | 0.7704            | HOMO $\rightarrow$ LUMO (89.88%)                                                                                                                                                            |
| 2     | 247.67                           | 0.0261            | HOMO-2 $\rightarrow$ LUMO (13.63%)<br>HOMO-1 $\rightarrow$ LUMO (25.19%)<br>HOMO $\rightarrow$ LUMO+1 (44.31%)                                                                              |
| 3     | 240.50                           | 0.0171            | HOMO-1 $\rightarrow$ LUMO (48.06%)<br>HOMO $\rightarrow$ LUMO+2 (36.88%)                                                                                                                    |
| 4     | 229.36                           | 0.0065            | HOMO-3 $\rightarrow$ LUMO (24.12%)<br>HOMO-2 $\rightarrow$ LUMO+1 (46.66%)<br>HOMO-1 $\rightarrow$ LUMO+1 (17.35%)                                                                          |
| $S_1$ |                                  |                   |                                                                                                                                                                                             |
| 1     | 445.76                           | 0.9705            | HOMO $\rightarrow$ LUMO (93.08%)                                                                                                                                                            |
| 2     | 331.66                           | 0.0010            | HOMO-1 $\rightarrow$ LUMO (72.72%)                                                                                                                                                          |
| 3     | 310.29                           | 0.0166            | HOMO-3 $\rightarrow$ LUMO (10.17%)<br>HOMO-2 $\rightarrow$ LUMO (32.35%)<br>HOMO-1 $\rightarrow$ LUMO (10.52%)<br>HOMO-1 $\rightarrow$ LUMO+1 (19.50%)                                      |
| 4     | 308.19                           | 0.0190            | HOMO-4 $\rightarrow$ LUMO (11.73%)<br>HOMO-3 $\rightarrow$ LUMO (28.25%)<br>HOMO-1 $\rightarrow$ LUMO (7.11%)<br>HOMO-1 $\rightarrow$ LUMO (17.34%)<br>HOMO-1 $\rightarrow$ LUMO+1 (19.05%) |
| 5     | 296.74                           | 0.0122            | HOMO-5 $\rightarrow$ LUMO (9.66%)<br>HOMO-4 $\rightarrow$ LUMO (19.68%)<br>HOMO-3 $\rightarrow$ LUMO (9.40%)<br>HOMO-1 $\rightarrow$ LUMO (38.85%)                                          |

**Table S14** Molecular orbital energies (in eV) and molecular orbital distributions (in %) of **6CP** at the ground state ( $S_0$ ) and first singlet excited state ( $S_1$ ) optimized geometries in THF.

|        | E (eV) | fluorene | carborane | silyl |
|--------|--------|----------|-----------|-------|
| $S_0$  |        |          |           |       |
| LUMO+3 | 0.70   | 30.20    | 8.49      | 61.32 |
| LUMO+2 | 0.64   | 1.49     | 9.75      | 88.76 |
| LUMO+1 | 0.31   | 4.90     | 3.55      | 91.55 |
| LUMO   | -0.22  | 80.50    | 13.72     | 5.78  |
| HOMO   | -7.40  | 93.28    | 4.20      | 2.52  |
| HOMO-1 | -8.30  | 88.05    | 0.38      | 11.57 |
| HOMO-2 | -8.33  | 3.65     | 1.67      | 94.68 |
| HOMO-3 | -8.36  | 5.98     | 2.41      | 91.62 |
| $S_1$  |        |          |           |       |
| LUMO+3 | 0.73   | 82.00    | 5.13      | 12.86 |
| LUMO+2 | 0.49   | 2.01     | 2.70      | 95.29 |
| LUMO+1 | 0.00   | 83.26    | 13.14     | 3.60  |
| LUMO   | -2.11  | 21.49    | 75.91     | 2.60  |
| HOMO   | -7.18  | 89.49    | 9.57      | 0.94  |
| HOMO-1 | -8.24  | 0.39     | 1.40      | 98.21 |
| HOMO-2 | -8.29  | 0.45     | 2.66      | 96.89 |
| HOMO-3 | -8.32  | 0.12     | 1.66      | 98.22 |

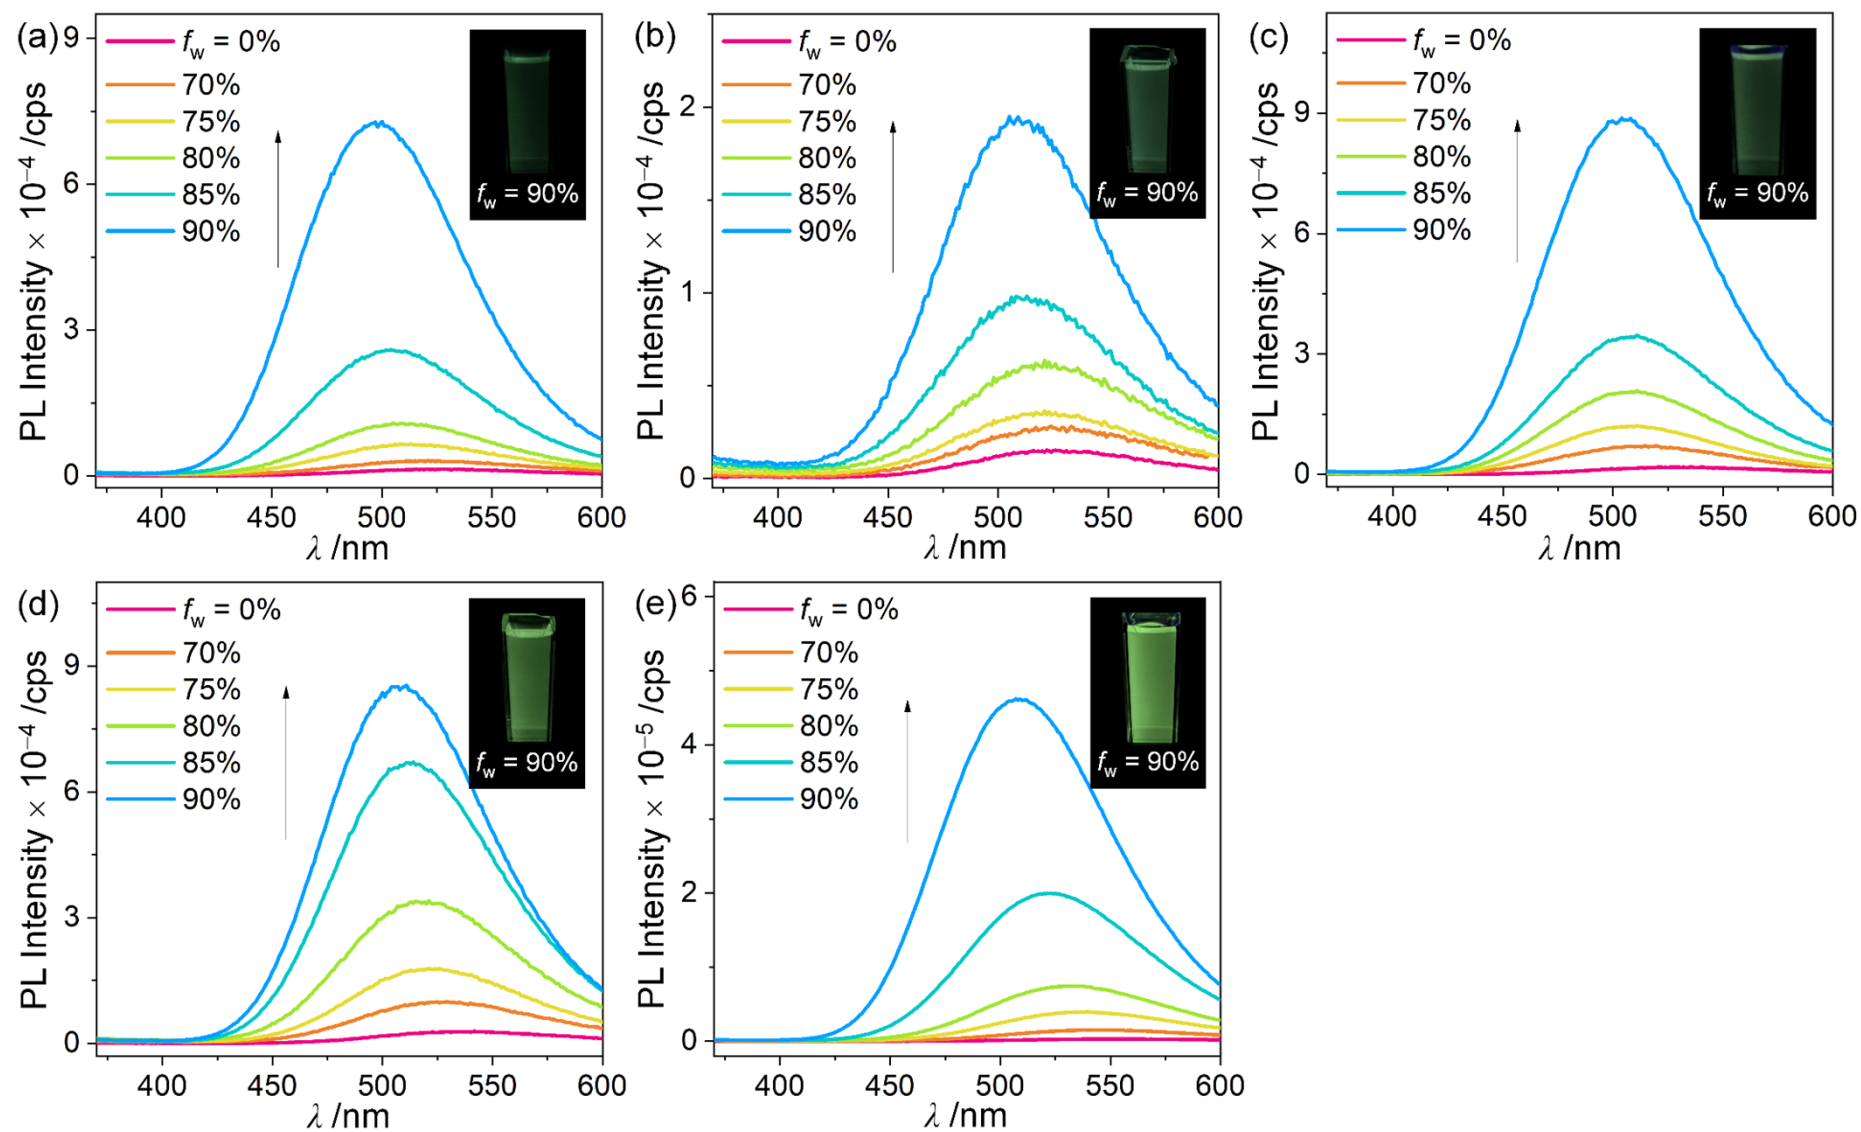

**Fig. S20** PL spectra of (a) **2CM** ( $\lambda_{\text{ex}} = 308$  nm), (b) **3CE** ( $\lambda_{\text{ex}} = 309$  nm), (c) **4CE** ( $\lambda_{\text{ex}} = 310$  nm), (d) **5CB** ( $\lambda_{\text{ex}} = 312$  nm), and (e) **6CP** ( $\lambda_{\text{ex}} = 315$  nm) in THF/distilled water mixtures ( $5.0 \times 10^{-5}$  M). Inset figures show the emission color in each state under irradiation by a hand-held UV lamp ( $\lambda_{\text{ex}} = 254$  nm).

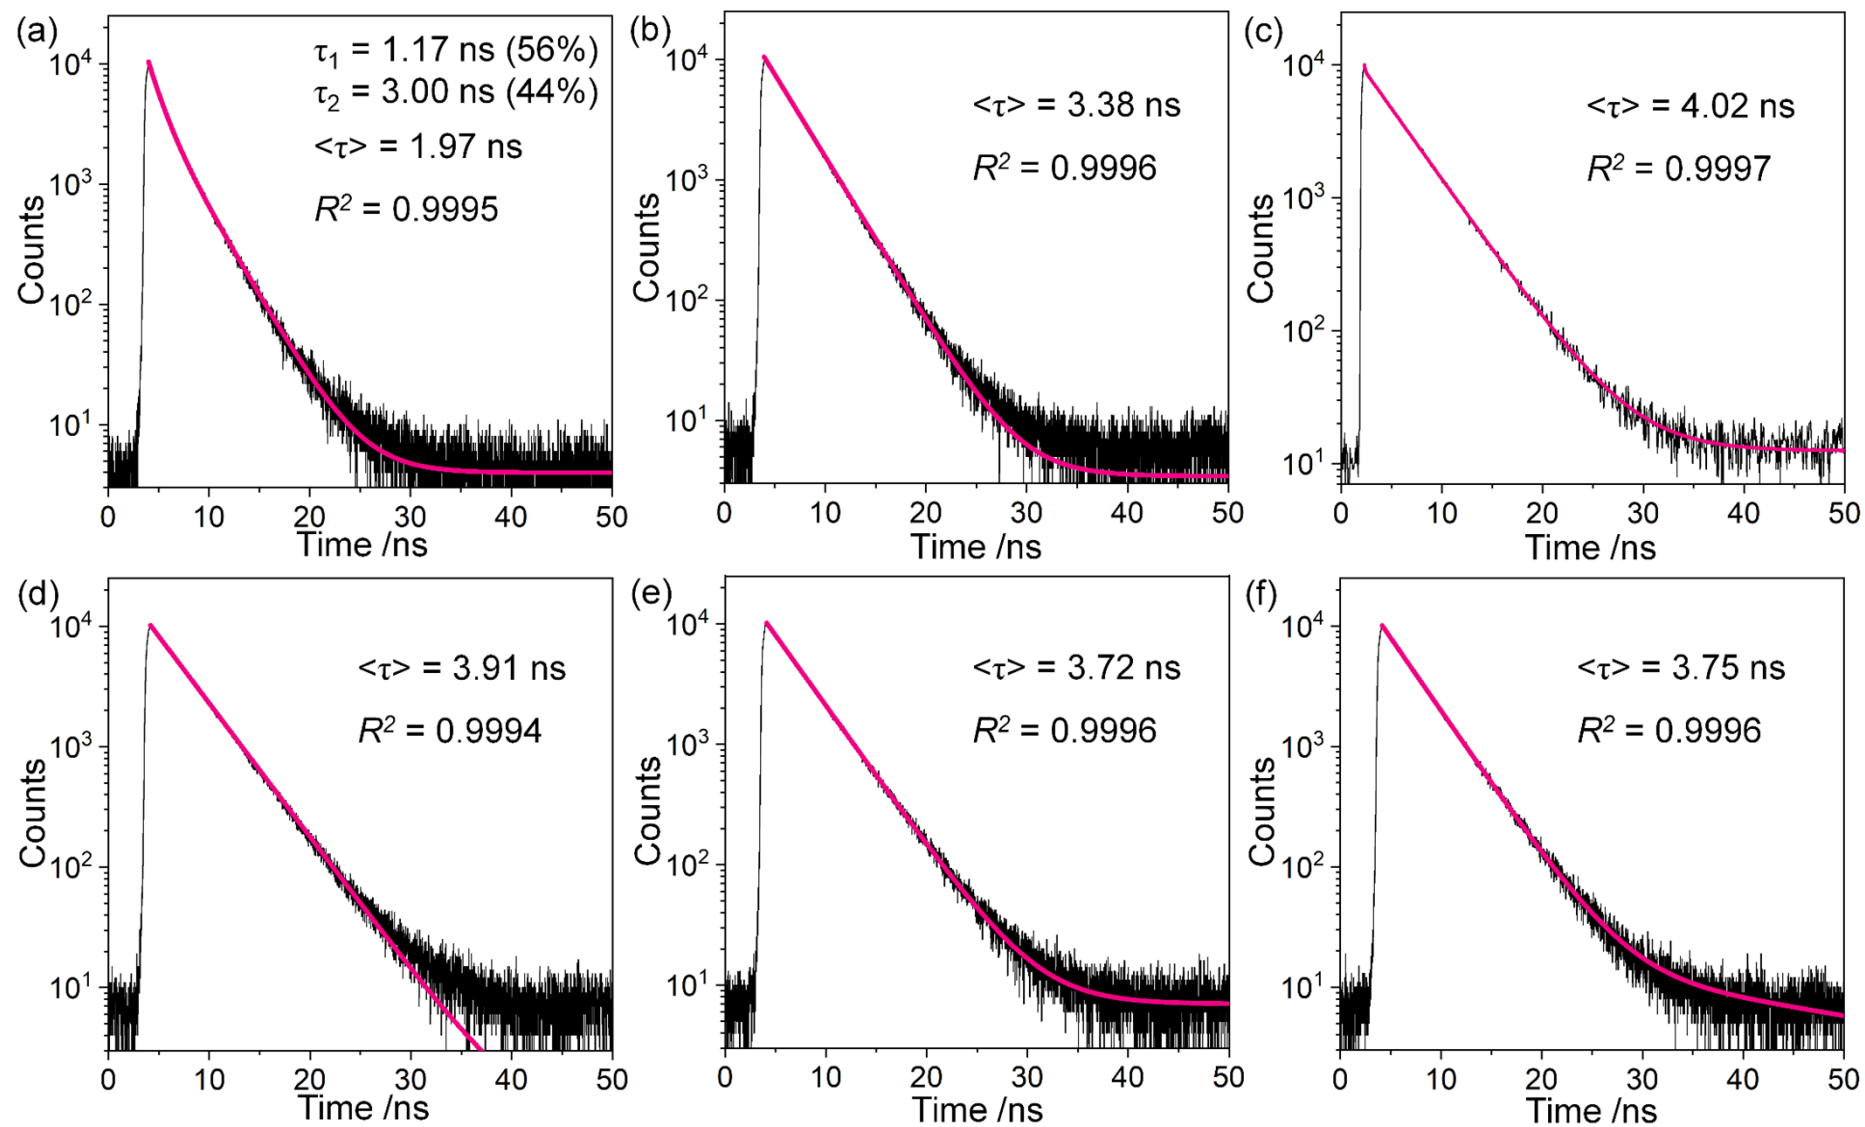

**Fig. S21** Emission decay curves for fluorene-based silyl-*o*-carboranyl compounds **1CH-6CP** in crystalline states detected at each emission maximum at 298 K. Each pink line is its exponential fitting curve for the decay curves.

**Table S15** Cartesian coordinates of the ground state ( $S_0$ ) fully optimized geometry of **1CH** in THF from CAM-B3LYP calculations (in Å)

| Atom | X        | Y        | Z        |   |          |          |          |   |          |          |          |
|------|----------|----------|----------|---|----------|----------|----------|---|----------|----------|----------|
| C    | -3.16450 | -0.48281 | -1.28397 | B | -4.80294 | -1.06899 | 0.82316  | C | 5.75060  | -1.51632 | -0.02950 |
| C    | -2.26142 | -0.25237 | 0.07667  | H | -5.47355 | -1.86627 | 1.38802  | H | 6.51470  | -2.28662 | -0.03898 |
| B    | -3.34821 | -1.58768 | -0.00765 | B | -3.21397 | -0.60176 | 1.44921  | C | 6.12382  | -0.17299 | -0.02914 |
| H    | -2.92158 | -2.67540 | -0.13630 | H | -2.66118 | -1.05595 | 2.38963  | H | 7.17627  | 0.09131  | -0.03830 |
| B    | -4.73045 | -1.01705 | -0.94545 | B | -4.53099 | 0.58174  | 1.41703  | C | 5.15957  | 0.83365  | -0.01685 |
| H    | -5.23291 | -1.77940 | -1.69571 | H | -5.01104 | 0.97702  | 2.42686  | H | 5.46175  | 1.87674  | -0.01630 |
| B    | -4.41392 | 0.64705  | -1.44101 | C | 1.47224  | 0.36127  | 0.01709  | C | 3.81931  | 0.48059  | -0.00502 |
| H    | -4.70078 | 1.01144  | -2.52803 | C | 0.10834  | 0.58236  | 0.03000  | C | 2.59650  | 1.38813  | 0.01005  |
| B    | -2.83001 | 1.11233  | -0.81508 | H | -0.27759 | 1.59483  | 0.04072  | C | 2.53914  | 2.27318  | -1.24535 |
| H    | -2.04422 | 1.72256  | -1.44456 | C | -0.77317 | -0.50686 | 0.03577  | H | 3.39056  | 2.95886  | -1.26919 |
| B    | -2.89719 | 1.06532  | 0.95061  | C | -0.25376 | -1.80479 | 0.03874  | H | 1.62496  | 2.87342  | -1.25253 |
| H    | -2.14055 | 1.73074  | 1.56674  | H | -0.91928 | -2.65669 | 0.06004  | H | 2.56055  | 1.66891  | -2.15547 |
| B    | -4.28161 | 1.64505  | 0.01394  | C | 1.11780  | -2.02999 | 0.02164  | C | 2.56325  | 2.26309  | 1.27345  |
| H    | -4.57829 | 2.79242  | 0.00564  | H | 1.49500  | -3.04734 | 0.02319  | H | 3.41527  | 2.94835  | 1.28636  |
| B    | -5.47026 | 0.32294  | -0.06184 | C | 1.98157  | -0.94351 | 0.00945  | H | 2.60156  | 1.65141  | 2.17795  |
| H    | -6.63667 | 0.52518  | -0.12894 | C | 3.44730  | -0.87050 | -0.00524 | H | 1.64953  | 2.86326  | 1.30310  |
|      |          |          |          | C | 4.40692  | -1.87651 | -0.01752 | H | -2.61436 | -0.84429 | -2.14245 |
|      |          |          |          | H | 4.11853  | -2.92299 | -0.01760 |   |          |          |          |

**Table S16** Cartesian coordinates of the first-excited state ( $S_1$ ) fully optimized geometry of **1CH** in THF from CAM-B3LYP calculations (in Å)

| Atom | X       | Y        | Z        | B | 8.53257 | 9.40994  | 15.29676 | C | 0.70715  | 2.56183 | 13.81701 |
|------|---------|----------|----------|---|---------|----------|----------|---|----------|---------|----------|
| C    | 7.10880 | 8.52530  | 17.48570 | H | 9.54923 | 9.30133  | 14.69075 | H | 0.61322  | 1.57336 | 13.38204 |
| C    | 5.91172 | 8.40724  | 15.49606 | B | 7.03722 | 8.98476  | 14.48188 | C | -0.43273 | 3.19427 | 14.34324 |
| B    | 7.55238 | 8.00571  | 15.94609 | H | 7.04158 | 8.53482  | 13.38315 | H | -1.38688 | 2.67967 | 14.30427 |
| H    | 7.90369 | 6.88176  | 15.80184 | B | 7.33288 | 10.67998 | 14.92449 | C | -0.36361 | 4.46677 | 14.91401 |
| B    | 8.54210 | 9.11629  | 17.03696 | H | 7.48253 | 11.49527 | 14.07160 | H | -1.25833 | 4.93289 | 15.31278 |
| H    | 9.51683 | 8.72976  | 17.59245 | C | 2.68978 | 6.53982  | 15.23736 | C | 0.85680  | 5.10791 | 14.95846 |
| B    | 7.24402 | 10.11052 | 17.75899 | C | 3.57245 | 7.54102  | 15.51460 | C | 1.19631  | 6.47873 | 15.51846 |
| H    | 7.20529 | 10.50072 | 18.87895 | H | 3.25286 | 8.45618  | 15.99817 | C | 0.90704  | 6.55492 | 17.02634 |
| B    | 5.76143 | 9.37758  | 16.94300 | C | 4.94880 | 7.38361  | 15.17343 | H | -0.16350 | 6.43999 | 17.21401 |
| H    | 4.74929 | 9.29662  | 17.55656 | C | 5.36515 | 6.18171  | 14.50082 | H | 1.21681  | 7.52478 | 17.42387 |
| B    | 5.72076 | 9.99292  | 15.21445 | H | 6.40618 | 6.08641  | 14.21975 | H | 1.43897  | 5.77272 | 17.57245 |
| H    | 4.71204 | 10.31696 | 14.67880 | C | 4.48464 | 5.17796  | 14.22185 | C | 0.44014  | 7.59036 | 14.77281 |
| B    | 6.46011 | 10.99630 | 16.45048 | H | 4.81591 | 4.27672  | 13.71868 | H | -0.63659 | 7.49079 | 14.93235 |
| H    | 5.96134 | 12.04871 | 16.68813 | C | 3.12674 | 5.33710  | 14.59307 | H | 0.63502  | 7.55128 | 13.69882 |
| B    | 8.22935 | 10.75886 | 16.42496 | C | 2.01447 | 4.47280  | 14.42682 | H | 0.74627  | 8.57200 | 15.14316 |
| H    | 9.01070 | 11.63250 | 16.62678 | C | 1.93437 | 3.18746  | 13.85166 | H | 6.98550  | 7.79295 | 18.27164 |
|      |         |          |          | H | 2.81804 | 2.70558  | 13.44831 |   |          |         |          |

**Table S17** Cartesian coordinates of the ground state ( $S_0$ ) fully optimized geometry of **2CM** in THF from CAM-B3LYP calculations (in Å)

| Atom | X        | Y        | Z        | B | -3.76348 | -2.75763 | -0.26831 | C | 2.92037  | 0.55719  | 2.43785  |
|------|----------|----------|----------|---|----------|----------|----------|---|----------|----------|----------|
| C    | -2.84697 | 0.36629  | 0.04995  | H | -4.07019 | -3.89742 | -0.38914 | H | 3.77686  | 0.55561  | 3.11763  |
| C    | -1.74676 | -0.86372 | -0.32630 | C | 1.96752  | -0.45357 | 0.32640  | H | 2.02341  | 0.34936  | 3.02824  |
| B    | -2.87085 | -0.34112 | -1.50688 | C | 0.61824  | -0.66770 | 0.53961  | H | 2.82586  | 1.55805  | 2.00931  |
| H    | -2.49705 | 0.29612  | -2.42253 | H | 0.25884  | -0.91596 | 1.53092  | C | 3.23202  | -1.89805 | 1.96948  |
| B    | -4.36370 | 0.01031  | -0.64478 | C | -0.27929 | -0.57334 | -0.53192 | H | 4.09335  | -1.93571 | 2.64206  |
| H    | -5.02220 | 0.91542  | -1.02521 | C | 0.21565  | -0.29765 | -1.81120 | H | 3.36142  | -2.66619 | 1.20336  |
| B    | -4.06984 | -0.25023 | 1.06704  | H | -0.46180 | -0.25836 | -2.65416 | H | 2.33970  | -2.14161 | 2.55294  |
| H    | -4.52238 | 0.47235  | 1.88601  | C | 1.57120  | -0.08242 | -2.02938 | H | -2.30177 | 2.22929  | 0.24018  |
| B    | -2.39691 | -0.76161 | 1.25391  | H | 1.92803  | 0.13030  | -3.03165 | C | -3.84818 | 3.20596  | 0.64688  |
| H    | -1.71269 | -0.39880 | 2.13971  | C | 2.44767  | -0.15513 | -0.95491 | C | -1.07143 | 2.39062  | 1.64268  |
| B    | -2.20340 | -2.31800 | 0.43621  | C | 3.90288  | 0.01726  | -0.87815 | C | -1.57484 | 2.84809  | -1.37060 |
| H    | -1.33172 | -3.03342 | 0.79055  | C | 4.83478  | 0.32168  | -1.86406 | H | -1.49373 | 2.05656  | 2.59363  |
| B    | -3.68876 | -1.95655 | 1.31525  | H | 4.52786  | 0.47545  | -2.89393 | H | -0.15032 | 1.83359  | 1.46062  |
| H    | -3.94342 | -2.49935 | 2.33827  | C | 6.17479  | 0.42643  | -1.50522 | H | -0.80792 | 3.44777  | 1.75004  |
| B    | -4.91927 | -1.48031 | 0.12467  | H | 6.91758  | 0.66338  | -2.25980 | H | -4.59754 | 3.14301  | -0.14502 |
| H    | -6.07632 | -1.68168 | 0.29258  | C | 6.57159  | 0.22924  | -0.18325 | H | -4.31002 | 2.87990  | 1.58125  |
| B    | -4.16958 | -1.53007 | -1.48600 | H | 7.62086  | 0.31431  | 0.08012  | H | -3.57080 | 4.25883  | 0.76107  |
| H    | -4.77086 | -1.76565 | -2.48047 | C | 5.63507  | -0.07622 | 0.80314  | H | -1.31034 | 3.90308  | -1.24572 |
| B    | -2.49865 | -2.05605 | -1.28433 | H | 5.95539  | -0.22838 | 1.82960  | H | -0.67097 | 2.30871  | -1.66001 |
| H    | -1.82710 | -2.59437 | -2.09445 | C | 4.29859  | -0.18141 | 0.45144  | H | -2.29308 | 2.78184  | -2.19156 |
|      |          |          |          | C | 3.10349  | -0.50197 | 1.33916  |   |          |          |          |

**Table S18** Cartesian coordinates of the first-excited state ( $S_1$ ) fully optimized geometry of **2CM** in THF from CAM-B3LYP calculations (in Å)

| Atom | X       | Y        | Z        | B | 7.32562  | 10.66176 | 14.89499 | C | 1.04664  | 6.32709 | 17.13551 |
|------|---------|----------|----------|---|----------|----------|----------|---|----------|---------|----------|
| C    | 7.17613 | 8.27856  | 17.33089 | H | 7.45636  | 11.54065 | 14.10396 | H | -0.00166 | 6.18569 | 17.41054 |
| C    | 5.89169 | 8.37829  | 15.37608 | C | 2.65408  | 6.52227  | 15.20054 | H | 1.39666  | 7.25058 | 17.60373 |
| B    | 7.53052 | 7.91065  | 15.69493 | C | 3.55642  | 7.49949  | 15.49992 | H | 1.62496  | 5.49399 | 17.54168 |
| H    | 7.85326 | 6.80404  | 15.41746 | H | 3.27896  | 8.35798  | 16.09926 | C | 0.36886  | 7.59236 | 15.05966 |
| B    | 8.58419 | 8.90211  | 16.81663 | C | 4.89834  | 7.39136  | 15.02720 | H | -0.68840 | 7.46194 | 15.30436 |
| H    | 9.59124 | 8.46877  | 17.27486 | C | 5.25442  | 6.26685  | 14.20209 | H | 0.46455  | 7.67318 | 13.97461 |
| B    | 7.34960 | 9.85694  | 17.67295 | H | 6.26694  | 6.21023  | 13.82374 | H | 0.70447  | 8.53167 | 15.50632 |
| H    | 7.37358 | 10.18358 | 18.81530 | C | 4.35381  | 5.28743  | 13.90019 | H | 7.02721  | 6.91719 | 18.63459 |
| B    | 5.82468 | 9.23101  | 16.88112 | H | 4.64094  | 4.44465  | 13.28179 | C | 8.28219  | 7.24152 | 19.99849 |
| H    | 4.83223 | 9.14724  | 17.52395 | C | 3.03386  | 5.39556  | 14.40162 | C | 5.29534  | 6.91879 | 19.36631 |
| B    | 5.71482 | 9.98582  | 15.20507 | C | 1.91113  | 4.54175  | 14.24547 | C | 7.37155  | 5.24216 | 17.85353 |
| H    | 4.68707 | 10.36127 | 14.74394 | C | 1.78189  | 3.32204  | 13.55015 | H | 5.05527  | 7.87983 | 19.82931 |
| B    | 6.53313 | 10.86819 | 16.48169 | H | 2.62717  | 2.89229  | 13.02427 | H | 4.53461  | 6.71574 | 18.60718 |
| H    | 6.07212 | 11.90525 | 16.83634 | C | 0.55608  | 2.69230  | 13.55661 | H | 5.21568  | 6.14600 | 20.13742 |
| B    | 8.29104 | 10.59682 | 16.35359 | H | 0.42477  | 1.75321  | 13.03132 | H | 9.30365  | 7.23673 | 19.60894 |
| H    | 9.10363 | 11.43243 | 16.59175 | C | -0.53381 | 3.25752  | 14.24077 | H | 8.11008  | 8.21025 | 20.47521 |
| B    | 8.50757 | 9.34124  | 15.10834 | H | -1.48821 | 2.74204  | 14.23017 | H | 8.21200  | 6.46864 | 20.77038 |
| H    | 9.49662 | 9.25546  | 14.45406 | C | -0.41516 | 4.46458  | 14.93228 | H | 7.29393  | 4.45453 | 18.60972 |
| B    | 6.96671 | 9.01610  | 14.33701 | H | -1.27204 | 4.87962  | 15.45197 | H | 6.65998  | 5.01288 | 17.05531 |
| H    | 6.89914 | 8.65165  | 13.20878 | C | 0.80505  | 5.10818  | 14.93804 | H | 8.37670  | 5.19762 | 17.42556 |
|      |         |          |          | C | 1.19264  | 6.41584  | 15.60736 |   |          |         |          |



**Table S19** Cartesian coordinates of the ground state ( $S_0$ ) fully optimized geometry of **3CE** in THF from CAM-B3LYP calculations (in Å)

| Atom | X       | Y        | Z        |   |          |          |          |  |   |          |          |          |
|------|---------|----------|----------|---|----------|----------|----------|--|---|----------|----------|----------|
|      |         |          |          | H | 5.85991  | -2.01814 | 0.39739  |  | H | -2.56754 | -2.14635 | 2.60494  |
| C    | 1.56269 | -1.10505 | -0.30263 | C | -2.11777 | -0.50830 | 0.35785  |  | H | -3.63775 | -2.62039 | 1.27440  |
| C    | 2.72166 | 0.11514  | -0.14557 | C | -0.78182 | -0.79726 | 0.56024  |  | C | -2.98221 | 0.58264  | 2.46658  |
| B    | 2.24608 | -0.76991 | 1.23367  | H | -0.42424 | -1.04547 | 1.55240  |  | H | -3.83151 | 0.64572  | 3.15246  |
| H    | 1.58690 | -0.23131 | 2.04809  | C | 0.10832  | -0.76650 | -0.52098 |  | H | -2.82442 | 1.56958  | 2.02478  |
| B    | 1.96574 | -2.43156 | 0.68687  | C | -0.38104 | -0.47547 | -1.79823 |  | H | -2.09627 | 0.32294  | 3.05292  |
| H    | 1.07278 | -3.04018 | 1.16507  | H | 0.28730  | -0.48569 | -2.64878 |  | H | 2.27291  | 2.01049  | -0.29767 |
| B    | 2.23930 | -2.47644 | -1.05651 | C | -1.72392 | -0.18078 | -2.00511 |  | C | 0.66616  | 2.40777  | 0.58124  |
| H    | 1.52642 | -3.10644 | -1.75819 | H | -2.07744 | 0.04439  | -3.00587 |  | H | 0.55863  | 3.49742  | 0.60538  |
| B    | 2.68700 | -0.84548 | -1.56474 | C | -2.59217 | -0.19154 | -0.92182 |  | H | 0.65223  | 2.05298  | 1.61427  |
| H    | 2.33695 | -0.35536 | -2.57406 | C | -4.03328 | 0.07068  | -0.83195 |  | H | -0.20330 | 1.99715  | 0.06573  |
| B    | 4.20644 | -0.42151 | -0.78739 | C | -4.95532 | 0.42296  | -1.81115 |  | C | 2.14492  | 2.43477  | -2.11855 |
| H    | 4.89475 | 0.38260  | -1.31728 | H | -4.65071 | 0.54801  | -2.84554 |  | H | 1.97535  | 3.51182  | -2.21479 |
| B    | 3.93022 | -2.07188 | -1.35963 | C | -6.28237 | 0.61361  | -1.43969 |  | H | 1.31226  | 1.92311  | -2.60605 |
| H    | 4.50171 | -2.49664 | -2.30773 | H | -7.01728 | 0.88883  | -2.18900 |  | H | 3.06173  | 2.19218  | -2.66204 |
| B    | 3.48952 | -3.05900 | 0.04962  | C | -6.67619 | 0.45379  | -0.11181 |  | C | 3.68768  | 2.99281  | 0.47265  |
| H    | 3.74050 | -4.21658 | 0.11900  | H | -7.71530 | 0.60595  | 0.16148  |  | H | 4.64253  | 2.51590  | 0.22879  |
| B    | 3.48114 | -2.00334 | 1.47866  | C | -5.74953 | 0.10055  | 0.86788  |  | H | 3.69670  | 3.95162  | -0.06134 |
| H    | 3.72864 | -2.38217 | 2.57469  | H | -6.06736 | -0.02156 | 1.89910  |  | C | 3.59282  | 3.25885  | 1.97987  |
| B    | 3.93877 | -0.38601 | 0.94616  | C | -4.42599 | -0.09051 | 0.50359  |  | H | 4.43846  | 3.85958  | 2.32676  |
| H    | 4.44828 | 0.43475  | 1.62463  | C | -3.24340 | -0.47531 | 1.38247  |  | H | 3.59124  | 2.33287  | 2.56059  |
| B    | 4.71027 | -1.79206 | 0.21112  | C | -3.45071 | -1.85380 | 2.03011  |  | H | 2.67935  | 3.80424  | 2.23222  |
|      |         |          |          | H | -4.30383 | -1.83065 | 2.71373  |  |   |          |          |          |

**Table S20** Cartesian coordinates of the first-excited state ( $S_1$ ) fully optimized geometry of **3CE** in THF from CAM-B3LYP calculations (in Å)

| Atom | X        | Y        | Z        |   |          |          |          |   |         |          |          |
|------|----------|----------|----------|---|----------|----------|----------|---|---------|----------|----------|
|      |          |          |          | H | 10.61803 | -0.40090 | 8.74168  | H | 7.49989 | 7.88762  | 9.77075  |
| C    | 7.39815  | 2.70190  | 9.80286  | C | 5.50017  | 5.91444  | 9.97956  | H | 6.59636 | 8.08976  | 11.28193 |
| C    | 7.40839  | 1.37038  | 7.87429  | C | 6.49379  | 5.02679  | 9.69164  | C | 5.34439 | 7.56000  | 8.07346  |
| B    | 8.28407  | 2.77373  | 8.31787  | H | 7.36820  | 5.32341  | 9.12512  | H | 5.19468 | 8.61172  | 7.81647  |
| H    | 8.16805  | 3.74973  | 7.65232  | C | 6.38221  | 3.67389  | 10.13103 | H | 4.53219 | 6.97794  | 7.63188  |
| B    | 8.99209  | 2.94942  | 10.01067 | C | 5.23656  | 3.29033  | 10.91224 | H | 6.28605 | 7.23373  | 7.62468  |
| H    | 9.31123  | 4.00123  | 10.45972 | H | 5.17717  | 2.26934  | 11.26676 | H | 6.03080 | 1.44976  | 6.58789  |
| B    | 8.05201  | 1.67582  | 10.88177 | C | 4.24116  | 4.17685  | 11.20425 | C | 4.87800 | 2.88177  | 6.99542  |
| H    | 7.65360  | 1.75273  | 11.99775 | H | 3.38269  | 3.86990  | 11.79072 | H | 4.08759 | 2.95201  | 6.24131  |
| B    | 7.00708  | 1.04139  | 9.50449  | C | 4.35372  | 5.50833  | 10.73572 | H | 5.40608 | 3.83881  | 7.01661  |
| H    | 5.90367  | 0.67881  | 9.75293  | C | 3.48596  | 6.62077  | 10.89137 | H | 4.39749 | 2.74169  | 7.96802  |
| B    | 8.07775  | 0.00249  | 8.43690  | C | 2.24585  | 6.72519  | 11.55359 | C | 5.05990 | -0.16001 | 6.63566  |
| H    | 7.70193  | -1.03221 | 7.99145  | H | 1.80824  | 5.86532  | 12.04846 | H | 4.19808 | -0.10074 | 5.96350  |
| B    | 8.46137  | 0.13507  | 10.15453 | C | 1.60629  | 7.94602  | 11.55555 | H | 4.68664 | -0.37441 | 7.64071  |
| H    | 8.40026  | -0.84269 | 10.82817 | H | 0.65134  | 8.05844  | 12.05607 | H | 5.67384 | -1.00754 | 6.31977  |
| B    | 9.72576  | 1.37721  | 10.37554 | C | 2.18185  | 9.05497  | 10.91198 | C | 6.74296 | 1.67434  | 4.85268  |
| H    | 10.58752 | 1.30165  | 11.19218 | H | 1.65824  | 10.00485 | 10.92822 | H | 7.45803 | 0.86407  | 4.66796  |
| B    | 9.94196  | 2.14507  | 8.77685  | C | 3.40927  | 8.96083  | 10.25350 | H | 5.91250 | 1.49808  | 4.15613  |
| H    | 10.96823 | 2.64215  | 8.44015  | H | 3.83211  | 9.83198  | 9.76464  | C | 7.39386 | 3.02626  | 4.54203  |
| B    | 9.00156  | 1.25716  | 7.57853  | C | 4.06282  | 7.74588  | 10.23990 | H | 7.72921 | 3.07873  | 3.50155  |
| H    | 9.36192  | 1.21953  | 6.44770  | C | 5.39226  | 7.38323  | 9.60022  | H | 8.26562 | 3.20733  | 5.17588  |
| B    | 9.74203  | 0.37968  | 8.93843  | C | 6.54525  | 8.20602  | 10.19707 | H | 6.69609 | 3.85404  | 4.70122  |
|      |          |          |          | H | 6.41210  | 9.26672  | 9.96941  |   |         |          |          |

**Table S21** Cartesian coordinates of the ground state ( $S_0$ ) fully optimized geometry of **4CE** in THF from CAM-B3LYP calculations (in Å)

| r | X        | Y        | Z        |   |          |          |          |   |          |         |          |
|---|----------|----------|----------|---|----------|----------|----------|---|----------|---------|----------|
| C | -1.49609 | -1.31500 | 0.31349  | C | 0.84119  | -0.97268 | -0.56810 | H | 2.13988  | 0.20731 | -3.04316 |
| C | -2.67825 | -0.12327 | 0.04380  | H | 0.48112  | -1.20767 | -1.56245 | H | 3.87345  | 0.53869 | -3.14306 |
| B | -2.62919 | -0.94994 | 1.54137  | C | -0.04398 | -0.96192 | 0.51707  | H | -2.29773 | 1.80151 | 0.01736  |
| H | -2.28544 | -0.36074 | 2.49966  | C | 0.45124  | -0.69804 | 1.79802  | C | -2.64742 | 2.50713 | 1.73653  |
| B | -2.15606 | -2.61711 | 1.18929  | H | -0.21326 | -0.73292 | 2.65117  | H | -3.00841 | 3.52929 | 1.56847  |
| H | -1.43615 | -3.16795 | 1.94777  | C | 1.79379  | -0.40367 | 2.00500  | H | -3.49594 | 1.97330 | 2.17704  |
| B | -1.87611 | -2.72917 | -0.55143 | H | 2.15202  | -0.20015 | 3.00869  | C | -1.47945 | 2.54908 | 2.72944  |
| H | -0.96937 | -3.36053 | -0.97086 | C | 2.65616  | -0.38781 | 0.91679  | H | -0.64414 | 3.14010 | 2.34428  |
| B | -2.18149 | -1.12536 | -1.24447 | C | 4.09600  | -0.11942 | 0.82548  | H | -1.09179 | 1.55275 | 2.95333  |
| H | -1.53488 | -0.65150 | -2.10833 | C | 5.02154  | 0.21626  | 1.80722  | H | -1.78794 | 2.99929 | 3.67733  |
| B | -3.88399 | -0.75295 | -0.99808 | H | 4.72129  | 0.32020  | 2.84520  | C | -3.50144 | 2.58951 | -1.20533 |
| H | -4.41246 | -0.01589 | -1.75156 | C | 6.34638  | 0.41773  | 1.43361  | H | -4.51708 | 2.23835 | -0.99454 |
| B | -3.39481 | -2.40156 | -1.37970 | H | 7.08392  | 0.68031  | 2.18484  | H | -3.50756 | 3.65707 | -0.95100 |
| H | -3.63288 | -2.88255 | -2.43704 | C | 6.73464  | 0.28477  | 0.10114  | C | -3.18129 | 2.43172 | -2.69680 |
| B | -3.39083 | -3.32171 | 0.14049  | H | 7.77211  | 0.44489  | -0.17374 | H | -3.91250 | 2.96232 | -3.31347 |
| H | -3.62147 | -4.48492 | 0.17882  | C | 5.80447  | -0.05180 | -0.88112 | H | -3.19003 | 1.38545 | -3.01049 |
| B | -3.85191 | -2.21466 | 1.45268  | H | 6.11803  | -0.15315 | -1.91588 | H | -2.19517 | 2.83607 | -2.94120 |
| H | -4.41822 | -2.56039 | 2.43533  | C | 4.48308  | -0.25338 | -0.51469 | C | -0.52894 | 2.17196 | -0.51610 |
| B | -4.15662 | -0.63171 | 0.72832  | C | 3.29729  | -0.62358 | -1.39555 | H | 0.17281  | 1.77157 | 0.22012  |
| H | -4.86565 | 0.20206  | 1.17819  | C | 3.50553  | -1.98685 | -2.07409 | H | -0.30773 | 1.65332 | -1.45466 |
| B | -4.63134 | -2.09772 | -0.13853 | H | 2.62028  | -2.26988 | -2.65049 | C | -0.28674 | 3.68024 | -0.68772 |
| H | -5.77670 | -2.35781 | -0.30575 | H | 3.69905  | -2.76904 | -1.33623 | H | 0.74847  | 3.87822 | -0.97951 |
| C | 2.17681  | -0.68136 | -0.36636 | H | 4.35481  | -1.94619 | -2.76167 | H | -0.47226 | 4.23051 | 0.23953  |
|   |          |          |          | C | 3.02751  | 0.45714  | -2.45498 | H | -0.93077 | 4.11452 | -1.45716 |
|   |          |          |          | H | 2.86848  | 1.43356  | -1.99055 |   |          |         |          |

**Table S22** Cartesian coordinates of the first-excited state ( $S_1$ ) fully optimized geometry of **4CE** in THF from CAM-B3LYP calculations (in Å)

| Atom | X        | Y        | Z        |   |          |          |          |  |   |          |         |          |
|------|----------|----------|----------|---|----------|----------|----------|--|---|----------|---------|----------|
|      |          |          |          | C | -0.08931 | 5.87558  | 16.80553 |  | H | -2.25291 | 6.02199 | 14.68844 |
| C    | 2.21252  | 6.78230  | 17.14389 | H | -0.38699 | 6.83046  | 16.38961 |  | H | -3.61474 | 4.89562 | 14.64821 |
| C    | 3.60943  | 7.14817  | 15.28595 | C | 1.25265  | 5.70902  | 17.26013 |  | H | 3.60019  | 6.05035 | 13.74957 |
| B    | 3.88628  | 6.47822  | 16.84123 | C | 1.63588  | 4.45151  | 17.84409 |  | C | 5.30819  | 5.29513 | 13.44430 |
| H    | 4.26219  | 5.35573  | 16.91796 | H | 2.64761  | 4.34617  | 18.21417 |  | H | 5.25512  | 4.82834 | 12.45191 |
| B    | 3.18431  | 7.26083  | 18.35613 | C | 0.76034  | 3.40847  | 17.93401 |  | H | 6.02847  | 6.11510 | 13.34018 |
| H    | 3.08147  | 6.67506  | 19.38395 | H | 1.06752  | 2.46635  | 18.37353 |  | C | 5.82822  | 4.27232 | 14.45921 |
| B    | 1.91885  | 8.31199  | 17.61111 | C | -0.55941 | 3.58159  | 17.45182 |  | H | 5.12357  | 3.44609 | 14.59699 |
| H    | 0.84461  | 8.53087  | 18.06720 | C | -1.65914 | 2.68364  | 17.41845 |  | H | 5.99284  | 4.72646 | 15.43887 |
| B    | 2.16929  | 7.90488  | 15.83010 | C | -1.75737 | 1.34501  | 17.84842 |  | H | 6.77923  | 3.83799 | 14.13533 |
| H    | 1.21572  | 7.88536  | 15.12481 | H | -0.90457 | 0.84070  | 18.28899 |  | C | 3.19033  | 7.05521 | 12.19928 |
| B    | 3.69009  | 8.77009  | 15.27909 | C | -2.96281 | 0.69485  | 17.69330 |  | H | 3.93221  | 7.85733 | 12.10881 |
| H    | 3.75528  | 9.32390  | 14.23050 | H | -3.06987 | -0.33516 | 18.01373 |  | H | 3.38238  | 6.38571 | 11.35048 |
| B    | 2.74026  | 9.47293  | 16.58746 | C | -4.06207 | 1.35597  | 17.11946 |  | C | 1.77853  | 7.63703 | 12.07723 |
| H    | 2.23016  | 10.53246 | 16.41178 | H | -4.99926 | 0.82148  | 17.00679 |  | H | 1.62923  | 8.11934 | 11.10611 |
| B    | 3.45975  | 9.00108  | 18.15318 | C | -3.97431 | 2.68192  | 16.69174 |  | H | 1.58486  | 8.38646 | 12.84790 |
| H    | 3.48810  | 9.71147  | 19.10708 | H | -4.83757 | 3.16889  | 16.25068 |  | H | 1.01225  | 6.86160 | 12.17622 |
| B    | 4.73764  | 7.81449  | 17.76388 | C | -2.77529 | 3.34841  | 16.84018 |  | C | 2.31726  | 4.68256 | 13.99783 |
| H    | 5.69425  | 7.65529  | 18.45177 | C | -2.42330 | 4.77706  | 16.46208 |  | H | 2.56763  | 4.13262 | 14.91288 |
| B    | 4.93786  | 7.73350  | 16.01325 | C | -3.27748 | 5.78936  | 17.24285 |  | H | 1.34387  | 5.14937 | 14.18993 |
| H    | 5.99723  | 7.46106  | 15.55055 | H | -2.96537 | 6.81010  | 17.00798 |  | C | 2.20307  | 3.70756 | 12.82005 |
| B    | 4.50333  | 9.28112  | 16.77759 | H | -3.18406 | 5.63998  | 18.32078 |  | H | 1.45075  | 2.93497 | 13.00685 |
| H    | 5.26875  | 10.19182 | 16.76185 | H | -4.33100 | 5.68795  | 16.97031 |  | H | 3.15141  | 3.19688 | 12.62662 |
| C    | -0.96610 | 4.83540  | 16.89264 | C | -2.57039 | 5.00936  | 14.94973 |  | H | 1.91765  | 4.22230 | 11.89743 |
|      |          |          |          | H | -1.96709 | 4.30004  | 14.37851 |  |   |          |         |          |

**Table S23** Cartesian coordinates of the ground state ( $S_0$ ) fully optimized geometry of **5CB** in THF from CAM-B3LYP calculations (in Å)

| Atom | X        | Y        | Z        |   |         |          |          |  |   |          |          |          |
|------|----------|----------|----------|---|---------|----------|----------|--|---|----------|----------|----------|
|      |          |          |          | C | 1.14853 | -0.91722 | 0.56991  |  | H | 4.16883  | -2.43455 | 1.32008  |
| C    | -2.45789 | -0.38752 | -0.13958 | H | 0.81444 | -1.18309 | 1.56572  |  | H | 3.05534  | -2.04461 | 2.64243  |
| C    | -1.14823 | -1.47757 | -0.29079 | C | 0.26204 | -0.99128 | -0.51201 |  | H | -2.18462 | 1.55474  | -0.32009 |
| B    | -2.29336 | -1.35416 | -1.55137 | C | 0.72254 | -0.67414 | -1.79361 |  | C | -0.56168 | 2.04409  | 0.49073  |
| H    | -2.00235 | -0.83884 | -2.56626 | H | 0.05985 | -0.76490 | -2.64394 |  | H | -0.53230 | 3.13367  | 0.58300  |
| B    | -3.85728 | -1.11695 | -0.78569 | C | 2.02978 | -0.25049 | -2.00458 |  | H | 0.29882  | 1.74060  | -0.10676 |
| H    | -4.63736 | -0.41655 | -1.33120 | H | 2.36138 | -0.00704 | -3.00855 |  | H | -0.44396 | 1.62619  | 1.49258  |
| B    | -3.59910 | -1.04349 | 0.94935  | C | 2.89259 | -0.15818 | -0.92063 |  | C | -2.11110 | 1.91985  | -2.15990 |
| H    | -4.20731 | -0.30473 | 1.63715  | C | 4.30049 | 0.24674  | -0.83428 |  | H | -1.96895 | 2.99313  | -2.31073 |
| B    | -1.87221 | -1.21354 | 1.23782  | C | 5.18569 | 0.67132  | -1.81882 |  | H | -3.02485 | 1.62509  | -2.68232 |
| H    | -1.28550 | -0.60063 | 2.05530  | H | 4.87284 | 0.74787  | -2.85547 |  | H | -1.27012 | 1.40986  | -2.63383 |
| B    | -1.39466 | -2.83585 | 0.70413  | C | 6.48667 | 0.99793  | -1.44987 |  | C | -3.58764 | 2.58434  | 0.49383  |
| H    | -0.43691 | -3.32853 | 1.19014  | H | 7.19271 | 1.33117  | -2.20336 |  | C | -3.36904 | 4.04179  | 0.03136  |
| B    | -2.95007 | -2.58898 | 1.48967  | C | 6.89127 | 0.90033  | -0.11920 |  | H | -4.08443 | 4.69240  | 0.54758  |
| H    | -3.15369 | -2.98722 | 2.58782  | H | 7.90976 | 1.15855  | 0.15205  |  | H | -3.53619 | 4.16295  | -1.04201 |
| B    | -4.19322 | -2.53441 | 0.21912  | C | 6.00162 | 0.47436  | 0.86588  |  | H | -2.36821 | 4.41783  | 0.26350  |
| H    | -5.30800 | -2.89513 | 0.40504  | H | 6.32770 | 0.40164  | 1.89920  |  | C | -3.48179 | 2.56178  | 2.02842  |
| B    | -3.38016 | -2.72353 | -1.34706 | C | 4.70420 | 0.14759  | 0.50406  |  | H | -4.25770 | 3.20499  | 2.46068  |
| H    | -3.89359 | -3.21602 | -2.29561 | C | 3.56344 | -0.33759 | 1.38855  |  | H | -2.51579 | 2.94136  | 2.37382  |
| B    | -1.65667 | -2.92092 | -1.03831 | C | 3.19449 | 0.70847  | 2.45270  |  | H | -3.61721 | 1.56206  | 2.44623  |
| H    | -0.87246 | -3.46056 | -1.73912 | H | 4.03044 | 0.86762  | 3.13936  |  | C | -5.00588 | 2.18045  | 0.06334  |
| B    | -2.82995 | -3.64559 | 0.06716  | H | 2.33621 | 0.37269  | 3.04164  |  | H | -5.72720 | 2.90385  | 0.46250  |
| H    | -2.93958 | -4.82466 | 0.14152  | H | 2.94142 | 1.66679  | 1.99260  |  | H | -5.29305 | 1.19561  | 0.43278  |
| C    | 2.44938  | -0.50027 | 0.36377  | C | 3.90564 | -1.67644 | 2.06153  |  | H | -5.11727 | 2.17775  | -1.02537 |
|      |          |          |          | H | 4.75143 | -1.55600 | 2.74405  |  |   |          |          |          |

**Table S24** Cartesian coordinates of the first-excited state ( $S_1$ ) fully optimized geometry of **5CB** in THF from CAM-B3LYP calculations (in Å)

| Atom | X       | Y        | Z        |   |          |         |          |  |   |         |         |          |
|------|---------|----------|----------|---|----------|---------|----------|--|---|---------|---------|----------|
|      |         |          |          | C | 3.57695  | 7.48223 | 15.57006 |  | H | 0.44938 | 7.75139 | 14.13108 |
| C    | 7.35817 | 8.23400  | 17.25173 | H | 3.33478  | 8.32994 | 16.19958 |  | H | 0.74916 | 8.57114 | 15.67333 |
| C    | 5.91812 | 8.33271  | 15.38702 | C | 4.90199  | 7.35983 | 15.05672 |  | H | 7.32353 | 6.74521 | 18.42167 |
| B    | 7.57888 | 7.89654  | 15.57883 | C | 5.21222  | 6.25154 | 14.19377 |  | C | 5.83330 | 5.68229 | 17.96964 |
| H    | 7.89958 | 6.79739  | 15.26455 | H | 6.21241  | 6.18507 | 13.78522 |  | H | 5.80697 | 4.77721 | 18.58291 |
| B    | 8.70182 | 8.89898  | 16.62831 | C | 4.28334  | 5.29789 | 13.89287 |  | H | 5.88740 | 5.36778 | 16.92370 |
| H    | 9.75382 | 8.48836  | 16.99542 | H | 4.53576  | 4.46572 | 13.24561 |  | H | 4.88786 | 6.21279 | 18.11125 |
| B    | 7.51554 | 9.81583  | 17.58666 | C | 2.98096  | 5.41965 | 14.43387 |  | C | 8.88544 | 5.73628 | 18.12182 |
| H    | 7.62107 | 10.15466 | 18.71749 | C | 1.83660  | 4.59117 | 14.28891 |  | H | 8.87216 | 4.81835 | 18.71680 |
| B    | 5.94763 | 9.15153  | 16.90734 | C | 1.66353  | 3.39311 | 13.56720 |  | H | 9.78951 | 6.29235 | 18.38095 |
| H    | 5.00617 | 9.03108  | 17.62015 | H | 2.48441  | 2.96162 | 13.00536 |  | H | 8.96382 | 5.44829 | 17.07024 |
| B    | 5.69449 | 9.93784  | 15.25361 | C | 0.42635  | 2.78611 | 13.59411 |  | C | 7.21913 | 7.22766 | 20.27551 |
| H    | 4.62710 | 10.29619 | 14.87677 | H | 0.26164  | 1.86360 | 13.04923 |  | C | 7.07373 | 5.93577 | 21.10082 |
| B    | 6.58528 | 10.81763 | 16.47731 | C | -0.63152 | 3.35365 | 14.32456 |  | H | 7.05350 | 6.17950 | 22.17040 |
| H    | 6.13158 | 11.83867 | 16.88383 | H | -1.59559 | 2.85641 | 14.32991 |  | H | 7.90816 | 5.24551 | 20.94190 |
| B    | 8.33508 | 10.58929 | 16.21057 | C | -0.46927 | 4.54018 | 15.04182 |  | H | 6.14658 | 5.40228 | 20.87171 |
| H    | 9.14452 | 11.44047 | 16.39961 | H | -1.30235 | 4.95780 | 15.59694 |  | C | 6.00259 | 8.12066 | 20.56299 |
| B    | 8.48312 | 9.35427  | 14.93544 | C | 0.76313  | 5.16056 | 15.02725 |  | H | 5.93568 | 8.32733 | 21.63884 |
| H    | 9.42249 | 9.29799  | 14.20881 | C | 1.19502  | 6.44404 | 15.71584 |  | H | 5.06501 | 7.63982 | 20.26571 |
| B    | 6.89725 | 9.00920  | 14.27778 | C | 1.08792  | 6.32349 | 17.24490 |  | H | 6.06438 | 9.08124 | 20.04707 |
| H    | 6.75070 | 8.65631  | 13.15348 | H | 0.04506  | 6.19286 | 17.54480 |  | C | 8.50059 | 7.94446 | 20.72957 |
| B    | 7.26107 | 10.65325 | 14.83208 | H | 1.46508  | 7.23075 | 17.72366 |  | H | 8.42971 | 8.20073 | 21.79433 |
| H    | 7.31200 | 11.54634 | 14.04784 | H | 1.66306  | 5.47249 | 17.61697 |  | H | 8.67405 | 8.87254 | 20.17965 |
| C    | 2.64663 | 6.53167  | 15.27147 | C | 0.38146  | 7.64895 | 15.21641 |  | H | 9.38433 | 7.31108 | 20.60618 |
|      |         |          |          | H | -0.67128 | 7.53504 | 15.48735 |  |   |         |         |          |

**Table S25** Cartesian coordinates of the ground state ( $S_0$ ) fully optimized geometry of **6CP** in THF from CAM-B3LYP calculations (in Å)

| Atom | X        | Y        | Z        |   |          |          |          |   |          |          |          |
|------|----------|----------|----------|---|----------|----------|----------|---|----------|----------|----------|
|      |          |          |          | C | 4.75722  | -0.36189 | -0.81751 | C | 0.17427  | -2.36833 | -0.49032 |
| C    | -0.41896 | 2.11105  | -0.64174 | C | 5.57636  | -1.03935 | -1.71362 | H | 0.36051  | -2.38523 | 0.57728  |
| C    | -1.88898 | 1.31429  | -0.24872 | H | 5.24655  | -1.24089 | -2.72799 | C | -1.63528 | -0.93008 | 1.92915  |
| B    | -0.41703 | 3.68861  | -0.00016 | C | 6.83235  | -1.45691 | -1.28490 | C | -0.34638 | -0.76628 | 2.46151  |
| H    | 0.62372  | 4.11456  | 0.36267  | H | 7.48633  | -1.98731 | -1.96925 | H | 0.46293  | -0.41684 | 1.82898  |
| B    | -1.12449 | 2.33904  | 0.89686  | C | 7.25808  | -1.19923 | 0.01744  | C | -0.07131 | -1.04577 | 3.79386  |
| H    | -0.62246 | 1.85591  | 1.84273  | H | 8.24069  | -1.53150 | 0.33630  | H | 0.93594  | -0.91453 | 4.17592  |
| B    | -2.86596 | 2.37818  | 0.65306  | C | 6.43486  | -0.51924 | 0.91385  | C | -1.08462 | -1.49410 | 4.63534  |
| H    | -3.53981 | 1.91504  | 1.50661  | H | 6.77708  | -0.32317 | 1.92571  | H | -0.87208 | -1.71134 | 5.67713  |
| B    | -1.96472 | 3.88677  | 0.81467  | C | 5.18246  | -0.10149 | 0.49217  | C | -2.36776 | -1.66490 | 4.13286  |
| H    | -2.06479 | 4.55588  | 1.78833  | C | 4.11727  | 0.65386  | 1.27584  | H | -3.16454 | -2.01680 | 4.78008  |
| B    | -1.72621 | 4.54711  | -0.81641 | C | 4.62240  | 2.04011  | 1.70890  | C | -2.63639 | -1.38976 | 2.79528  |
| H    | -1.64288 | 5.71197  | -1.02579 | H | 5.45790  | 1.94191  | 2.40750  | H | -3.64410 | -1.54120 | 2.42494  |
| B    | -2.46150 | 3.42166  | -1.97431 | H | 3.82850  | 2.60037  | 2.21086  | C | -3.79530 | -1.18366 | -0.22891 |
| H    | -2.92074 | 3.75476  | -3.01547 | H | 4.96156  | 2.62194  | 0.84859  | C | -4.00775 | -2.35582 | -0.96817 |
| B    | -3.17565 | 2.09918  | -1.05510 | C | 3.65060  | -0.14183 | 2.50468  | H | -3.16564 | -2.88553 | -1.39804 |
| H    | -4.07851 | 1.43819  | -1.42645 | H | 4.47664  | -0.28325 | 3.20702  | C | -5.28622 | -2.86852 | -1.16848 |
| B    | -3.24262 | 3.74061  | -0.40991 | H | 3.27278  | -1.12663 | 2.21822  | H | -5.41587 | -3.77635 | -1.74876 |
| H    | -4.27870 | 4.31137  | -0.32003 | H | 2.85550  | 0.39572  | 3.02976  | C | -6.38900 | -2.22152 | -0.62805 |
| C    | 3.01550  | 0.77137  | 0.23085  | H | -2.02583 | -0.61916 | 0.11367  | H | -7.38719 | -2.61790 | -0.78376 |
| C    | 1.77401  | 1.36831  | 0.35342  | C | -0.87374 | -1.59695 | -1.00743 | C | -6.20461 | -1.06259 | 0.11930  |
| H    | 1.48734  | 1.83904  | 1.28657  | C | -1.08970 | -1.64517 | -2.39438 | H | -7.05836 | -0.55058 | 0.55117  |
| C    | 0.89861  | 1.38358  | -0.74089 | H | -1.91331 | -1.09393 | -2.83655 | C | -4.92686 | -0.55541 | 0.31595  |
| C    | 1.31225  | 0.82130  | -1.95229 | C | -0.28030 | -2.40606 | -3.22770 | H | -4.81856 | 0.34725  | 0.90545  |
| H    | 0.65737  | 0.85222  | -2.81221 | H | -0.47182 | -2.42494 | -4.29571 | B | -1.61547 | 1.87799  | -1.84082 |
| C    | 2.55628  | 0.21761  | -2.07785 | C | 0.76774  | -3.14778 | -2.69147 | H | -1.43561 | 1.09853  | -2.70131 |
| H    | 2.84931  | -0.21829 | -3.02698 | H | 1.40115  | -3.74443 | -3.34008 | B | -0.72069 | 3.40051  | -1.71261 |
| C    | 3.40682  | 0.18848  | -0.98072 | C | 0.98919  | -3.13155 | -1.32055 | H | 0.11199  | 3.62822  | -2.51979 |
|      |          |          |          | H | 1.79592  | -3.71709 | -0.89172 |   |          |          |          |

**Table S26** Cartesian coordinates of the first-excited state ( $S_1$ ) fully optimized geometry of **6CP** in THF from CAM-B3LYP calculations (in Å)

| tom | X       | Y       | Z        |   |          |          |          |   |          |          |          |
|-----|---------|---------|----------|---|----------|----------|----------|---|----------|----------|----------|
| C   | 5.83223 | 3.12221 | 12.15264 | C | 9.44377  | 2.58805  | 7.84911  | C | 5.85154  | -0.68359 | 9.44645  |
| C   | 4.45141 | 1.33478 | 12.80859 | C | 9.46259  | 2.77331  | 6.45234  | H | 6.58631  | -1.23400 | 10.02321 |
| B   | 6.21181 | 3.76781 | 13.59573 | H | 8.58480  | 3.13807  | 5.93091  | C | 5.69081  | -1.50931 | 12.68876 |
| H   | 7.30190 | 4.22553 | 13.70520 | C | 10.62309 | 2.47980  | 5.76883  | C | 7.07222  | -1.29565 | 12.55319 |
| B   | 5.92534 | 1.95786 | 13.42990 | H | 10.66908 | 2.61181  | 4.69388  | H | 7.43753  | -0.42714 | 12.01508 |
| H   | 6.87324 | 1.25209 | 13.46892 | C | 11.75549 | 2.00867  | 6.45451  | C | 8.00207  | -2.17493 | 13.09448 |
| B   | 4.44562 | 1.53129 | 14.42120 | H | 12.65673 | 1.78494  | 5.89379  | H | 9.06319  | -1.98232 | 12.97017 |
| H   | 4.40819 | 0.56061 | 15.10536 | C | 11.74595 | 1.82237  | 7.83799  | C | 7.57352  | -3.29773 | 13.79521 |
| B   | 5.43833 | 2.90688 | 14.91417 | H | 12.63411 | 1.45849  | 8.34341  | H | 8.29762  | -3.98507 | 14.22099 |
| H   | 6.00155 | 2.84966 | 15.95947 | C | 10.59177 | 2.10931  | 8.53762  | C | 6.21278  | -3.53304 | 13.94416 |
| B   | 4.71254 | 4.41277 | 14.29112 | C | 10.32435 | 1.99313  | 10.02870 | H | 5.86722  | -4.40659 | 14.48788 |
| H   | 4.72621 | 5.44519 | 14.88181 | C | 11.26075 | 2.90384  | 10.83895 | C | 5.28716  | -2.65091 | 13.39424 |
| B   | 3.37609 | 3.90049 | 13.22503 | H | 12.29838 | 2.58018  | 10.72411 | H | 4.23006  | -2.85991 | 13.51903 |
| H   | 2.41605 | 4.57336 | 13.02783 | H | 11.00930 | 2.85904  | 11.90159 | C | 2.70284  | -1.13940 | 12.15380 |
| B   | 3.15737 | 2.15875 | 13.36063 | H | 11.18528 | 3.94291  | 10.51088 | C | 2.06115  | -1.78617 | 11.08972 |
| H   | 2.08133 | 1.69203 | 13.19187 | C | 10.44827 | 0.53694  | 10.50714 | H | 2.51919  | -1.79027 | 10.10609 |
| B   | 3.67297 | 3.09406 | 14.78636 | H | 11.47275 | 0.17886  | 10.37798 | C | 0.83765  | -2.42696 | 11.26220 |
| H   | 2.95262 | 3.19789 | 15.72736 | H | 9.77942  | -0.12213 | 9.94853  | H | 0.36203  | -2.91774 | 10.41886 |
| C   | 8.88317 | 2.47342 | 10.09805 | H | 10.19796 | 0.46464  | 11.56884 | C | 0.22719  | -2.43746 | 12.51014 |
| C   | 8.07458 | 2.60072 | 11.18839 | H | 4.40401  | -0.34787 | 11.93502 | H | -0.72766 | -2.93508 | 12.64720 |
| H   | 8.42690 | 2.35610 | 12.18323 | C | 4.72292  | -0.14957 | 10.08096 | C | 0.84725  | -1.80645 | 13.58412 |
| C   | 6.73012 | 3.04806 | 11.02210 | C | 3.78709  | 0.51674  | 9.27265  | H | 0.37823  | -1.81015 | 14.56291 |
| C   | 6.27744 | 3.41271 | 9.70749  | H | 2.88320  | 0.92322  | 9.71536  | C | 2.06777  | -1.16661 | 13.40478 |
| H   | 5.26574 | 3.78063 | 9.59811  | C | 3.97816  | 0.66051  | 7.90410  | H | 2.53045  | -0.68019 | 14.25782 |
| C   | 7.08560 | 3.29266 | 8.61461  | H | 3.23425  | 1.17754  | 7.30628  | B | 4.14664  | 2.81374  | 11.97324 |
| H   | 6.72512 | 3.56444 | 7.62910  | C | 5.11844  | 0.13745  | 7.30210  | H | 3.70354  | 2.77030  | 10.87742 |
| C   | 8.40450 | 2.80995 | 8.79133  | H | 5.27035  | 0.24682  | 6.23286  | B | 4.90527  | 4.40331  | 12.52764 |
|     |         |         |          | C | 6.05312  | -0.53852 | 8.07644  | H | 4.98648  | 5.35031  | 11.81598 |
|     |         |         |          | H | 6.93863  | -0.96348 | 7.61411  |   |          |          |          |
